# Supplementary material for: Efficient and stereoselective synthesis of sugar fused pyrano[3,2-c]pyranones as anticancer agents
Source: Royal Society of Chemistry journal article supplement (doi:10.1039/d3ra02371k), 2023-01-01
Supplement: d3ra02371k1.pdf [file d3ra02371k1.pdf]

## Efficient and Stereoselective Synthesis of Sugar Fused Pyrano[3,2- c]Pyranones as Anticancer Agents

Sandeep Kumar,<sup>a,b,\*</sup> Ram Krishna Sahu,<sup>c</sup> Priti Kumari,<sup>a</sup> Jyotirmoy Maity,<sup>d</sup> Binayak Kumar,<sup>c</sup>

Rajni Johar Chhatwal,<sup>e</sup> Brajendra K Singh<sup>a,\*</sup> and Ashok K. Prasad<sup>a</sup>

<sup>a</sup>Bioorganic Laboratory, <sup>b</sup>Acharya Narendra Dev College, <sup>d</sup>St. Stephen College, <sup>e</sup>Maitreyi College,

Department of Chemistry, University of Delhi, Delhi- 110 007, India

<sup>c</sup>National Institute of Cancer Prevention & Research, Noida, Uttar Pradesh, India

Email: [skbanger388@gmail.com](mailto:skbanger388@gmail.com)

|                                                                                    |    |
|------------------------------------------------------------------------------------|----|
| <b>Table of contents</b>                                                           | 1  |
| <sup>1</sup> H- and <sup>13</sup> C-NMR spectra of compound <b>2a</b>              | 3  |
| <sup>1</sup> H- and <sup>13</sup> C-NMR spectra of compound <b>2b</b>              | 4  |
| <sup>1</sup> H- and <sup>13</sup> C-NMR spectra of compound <b>4a</b>              | 5  |
| <sup>1</sup> H- <sup>1</sup> H-COSY and DEPT-135-NMR spectra of compound <b>4a</b> | 6  |
| <sup>1</sup> H- <sup>13</sup> C-HETCOR and NOESY-NMR spectra of compound <b>4a</b> | 7  |
| <sup>1</sup> H- and <sup>13</sup> C-NMR spectra of compound <b>4b</b>              | 8  |
| <sup>1</sup> H- and <sup>13</sup> C-NMR spectra of compound <b>4c</b>              | 9  |
| <sup>1</sup> H- and <sup>13</sup> C-NMR spectra of compound <b>4d</b>              | 10 |
| <sup>1</sup> H- and <sup>13</sup> C-NMR spectra of compound <b>4e</b>              | 11 |
| <sup>1</sup> H- and <sup>13</sup> C-NMR spectra of compound <b>4f</b>              | 12 |
| <sup>1</sup> H- and <sup>13</sup> C-NMR spectra of compound <b>4g</b>              | 13 |
| <sup>1</sup> H- and <sup>13</sup> C-NMR spectra of compound <b>4h</b>              | 14 |
| <sup>1</sup> H- and <sup>13</sup> C-NMR spectra of compound <b>4i</b>              | 15 |
| <sup>1</sup> H- and <sup>13</sup> C-NMR spectra of compound <b>5a</b>              | 16 |
| <sup>1</sup> H- <sup>1</sup> H-COSY and DEPT-135-NMR spectra of compound <b>5a</b> | 17 |
| <sup>1</sup> H- <sup>13</sup> C-HETCOR and NOESY-NMR spectra of compound <b>5a</b> | 18 |
| <sup>1</sup> H- and <sup>13</sup> C-NMR spectra of compound <b>5b</b>              | 19 |
| <sup>1</sup> H- and <sup>13</sup> C-NMR spectra of compound <b>5c</b>              | 20 |
| <sup>1</sup> H- and <sup>13</sup> C-NMR spectra of compound <b>5d</b>              | 21 |
| <sup>1</sup> H- and <sup>13</sup> C-NMR spectra of compound <b>5e</b>              | 22 |
| <sup>1</sup> H- and <sup>13</sup> C-NMR spectra of compound <b>5f</b>              | 23 |
| <sup>1</sup> H- and <sup>13</sup> C-NMR spectra of compound <b>5g</b>              | 24 |

|                                                                       |       |
|-----------------------------------------------------------------------|-------|
| $^1\text{H}$ - and $^{13}\text{C}$ -NMR spectra of compound <b>5h</b> | 25    |
| $^1\text{H}$ - and $^{13}\text{C}$ -NMR spectra of compound <b>5i</b> | 26    |
| Anti-cancer results for MDA-MB-231 cell line                          | 27-30 |

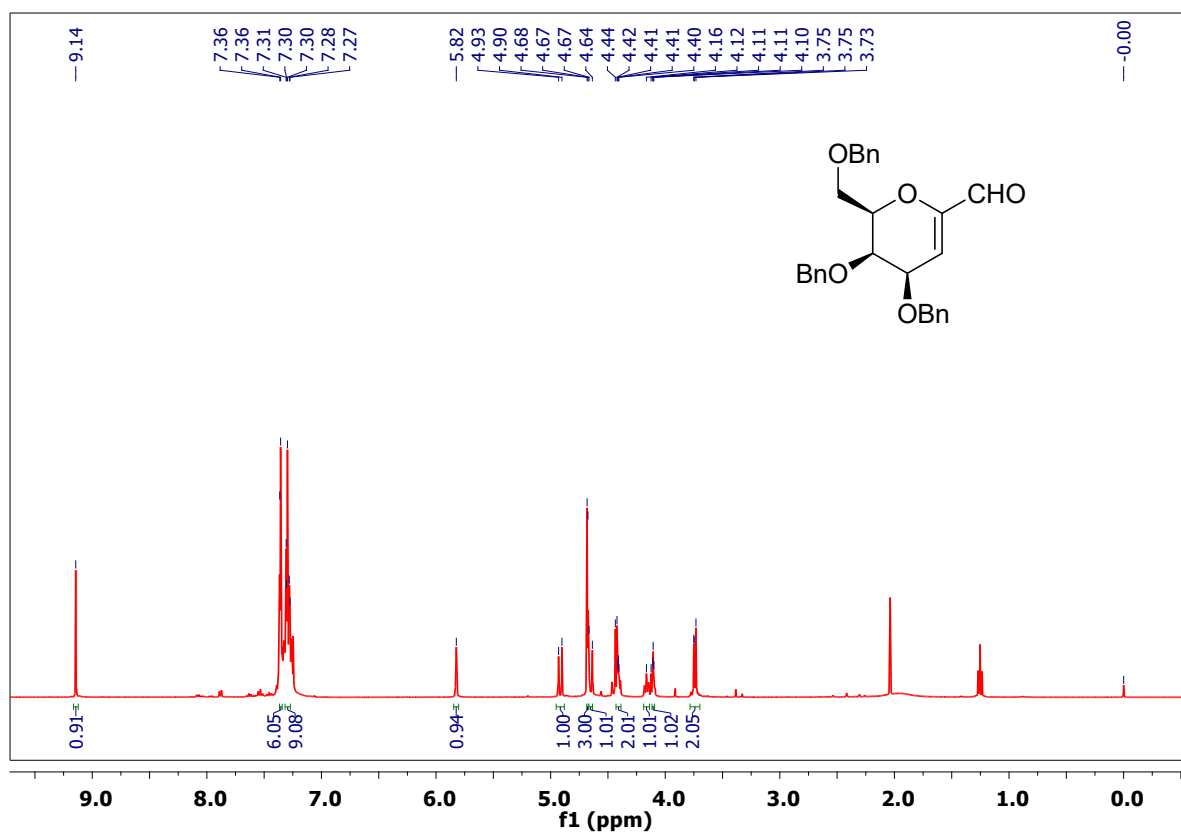

Figure 1:  $^1\text{H}$  NMR spectrum of compound 2a (400 MHz,  $\text{CDCl}_3$ )

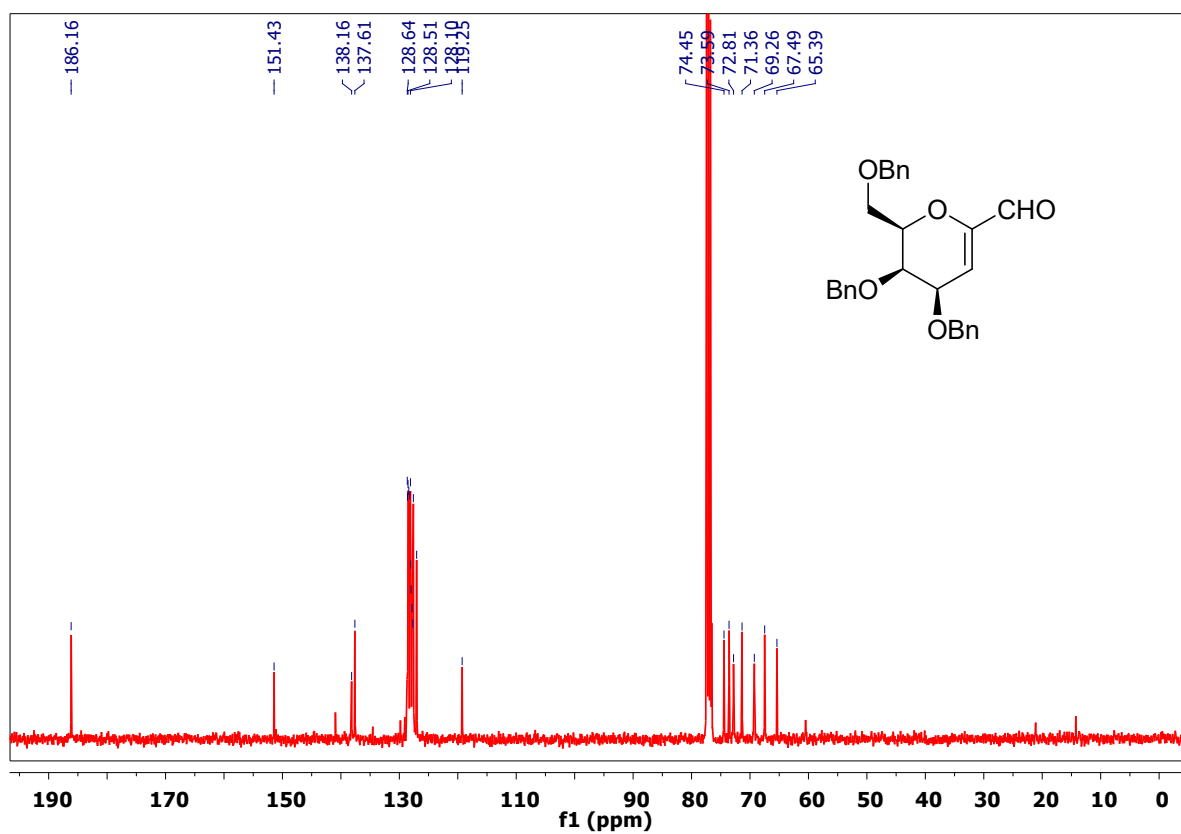

**Figure 2:**  $^{13}\text{C}$  NMR spectrum of compound **2a** (100.6 MHz,  $\text{CDCl}_3$ )

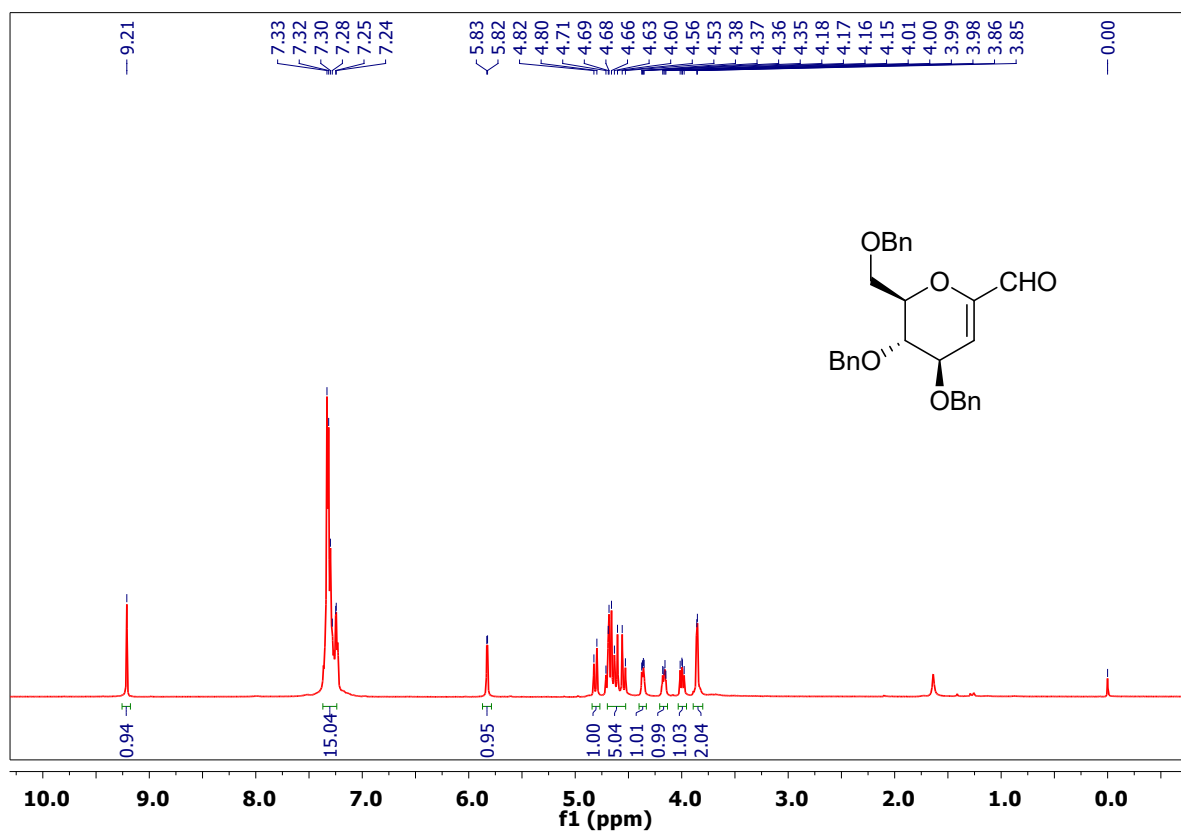

**Figure 3:**  $^1\text{H}$  NMR spectrum of compound **2b** (400 MHz,  $\text{CDCl}_3$ )

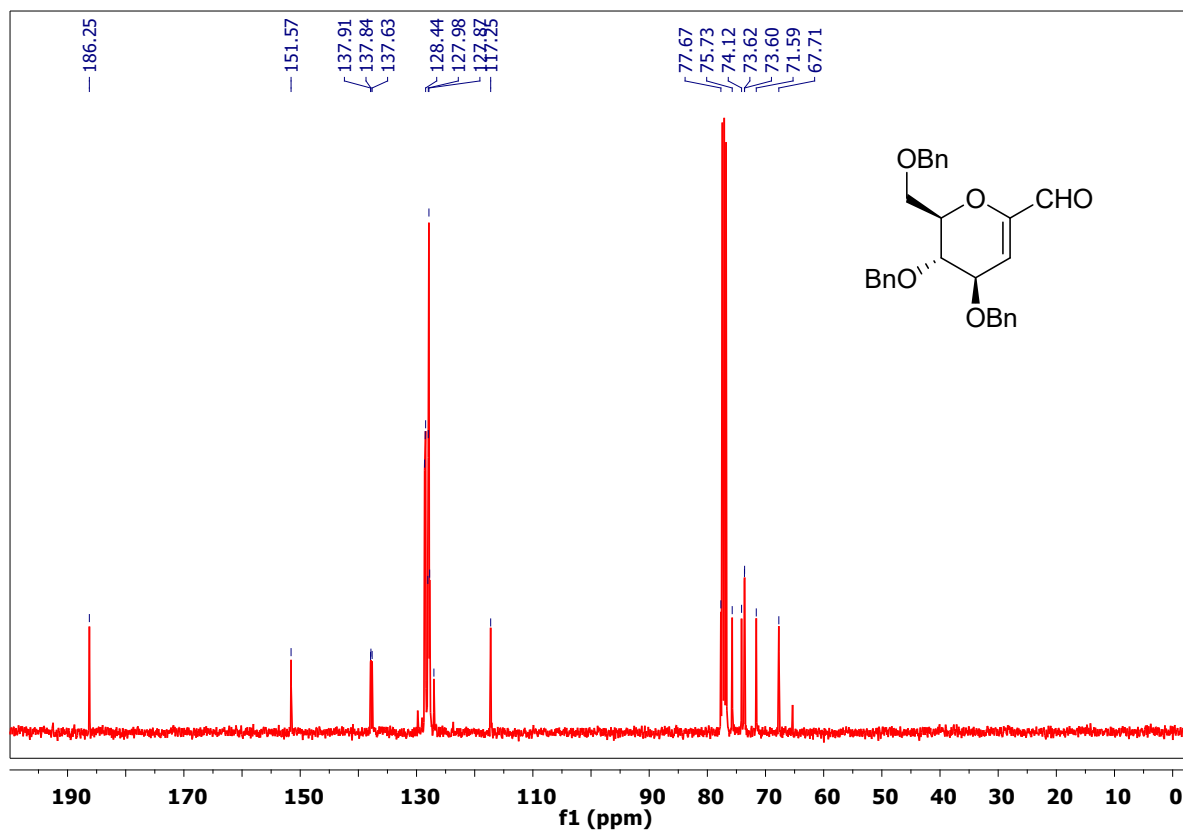

Figure 4: <sup>13</sup>C NMR spectrum of compound 2b (100.6 MHz, CDCl<sub>3</sub>)

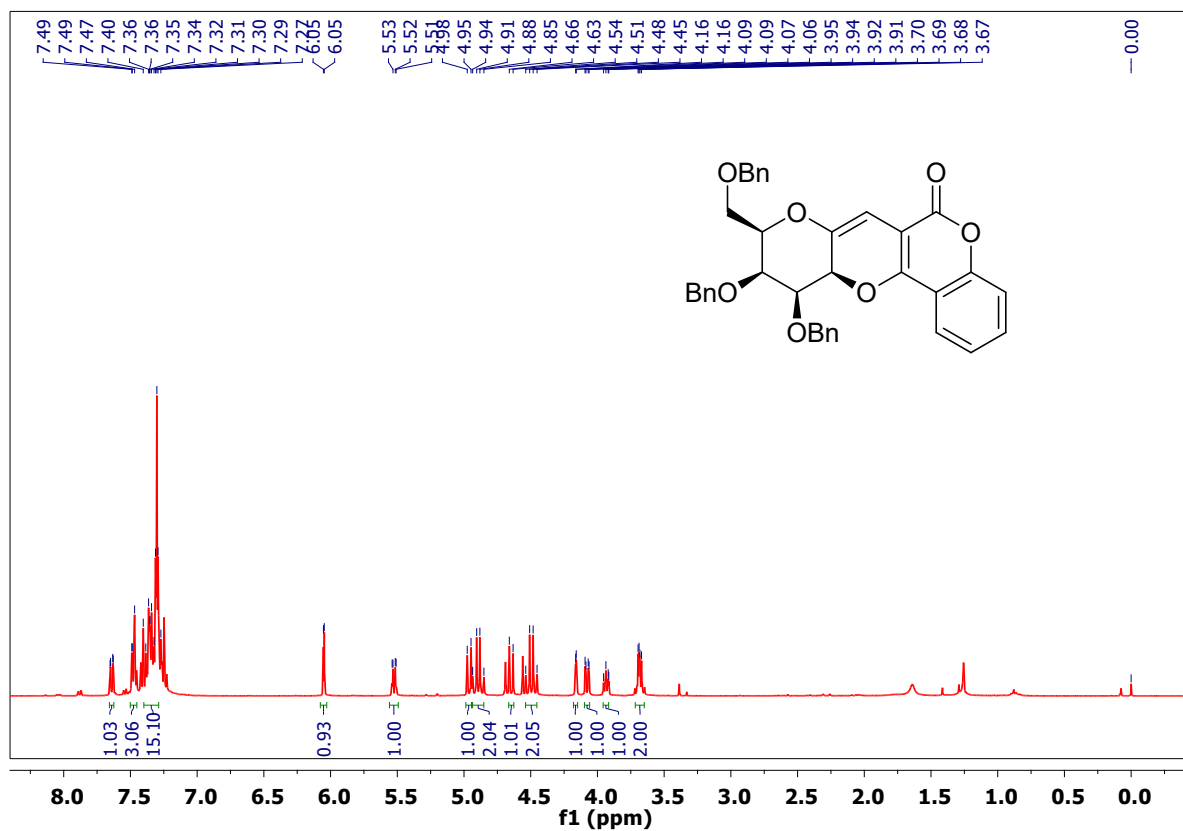

**Figure 5:**  $^1\text{H}$  NMR spectrum of compound **4a** (400 MHz,  $\text{CDCl}_3$ )

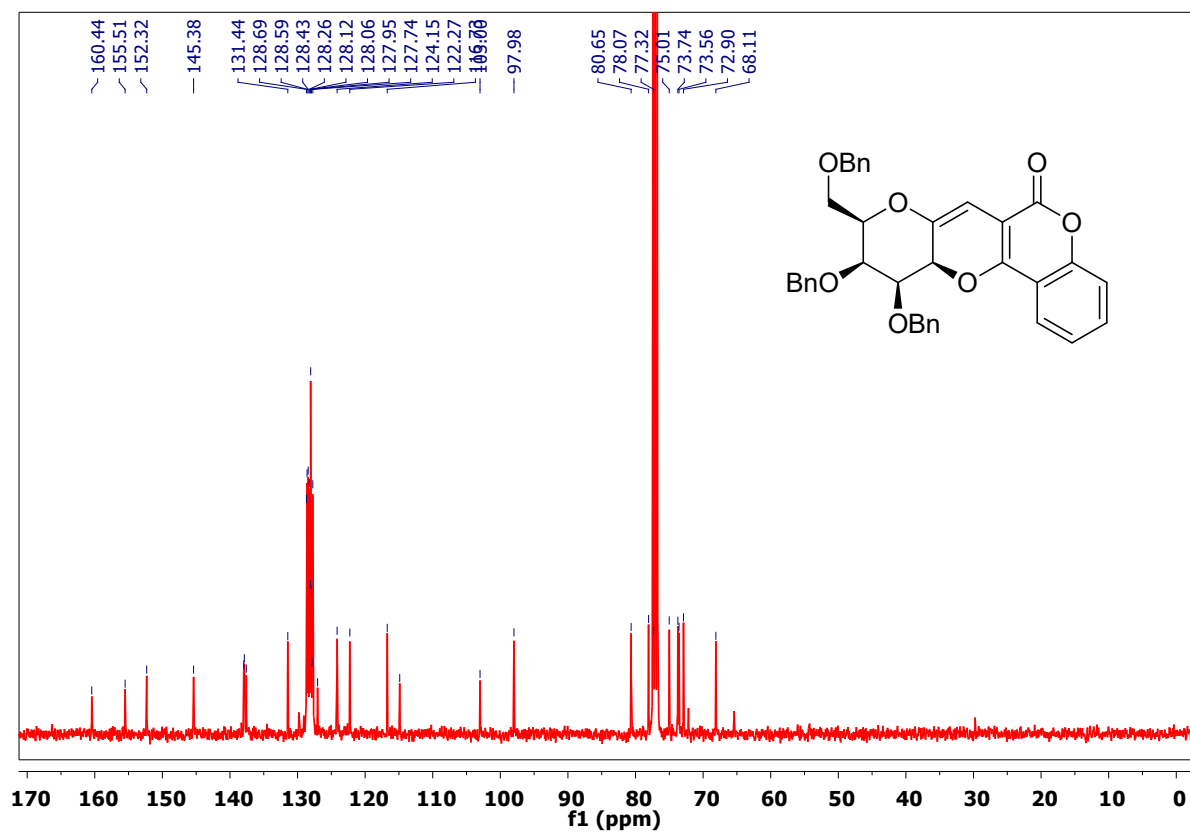

**Figure 6:**  $^{13}\text{C}$  NMR spectrum of compound **4a** (100.6 MHz,  $\text{CDCl}_3$ )

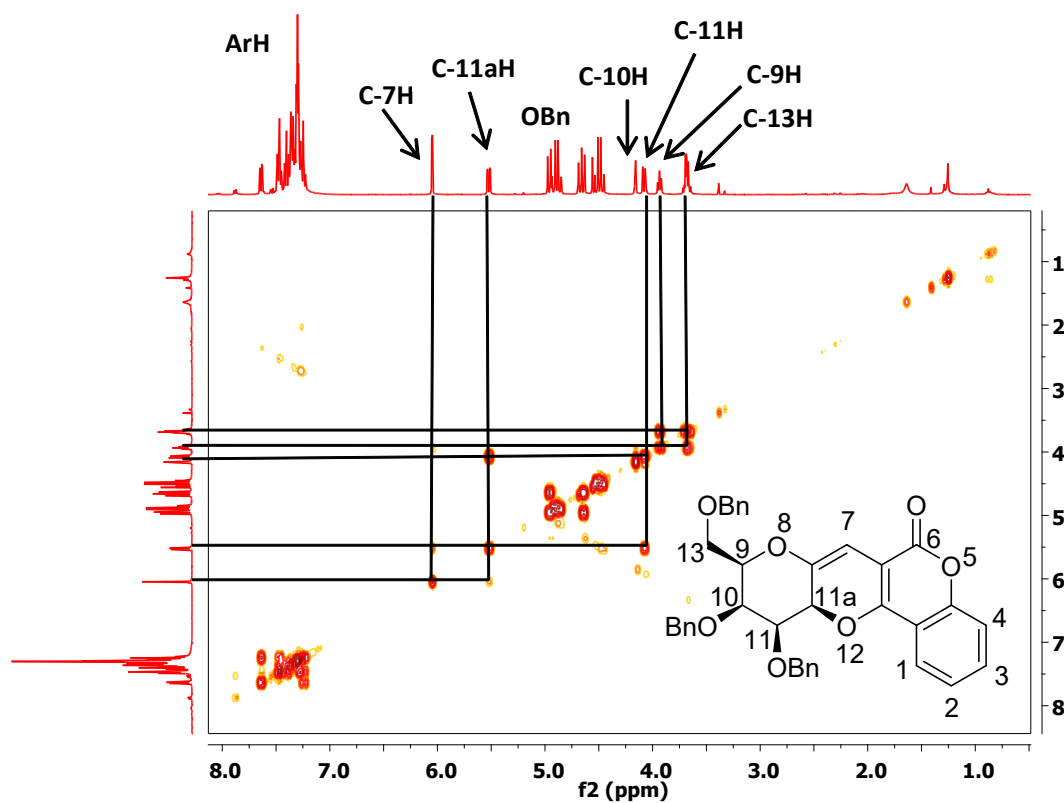

**Figure 7:**  $^1\text{H}$ - $^1\text{H}$  COSY NMR spectrum of compound **4a** (400 MHz,  $\text{CDCl}_3$ )

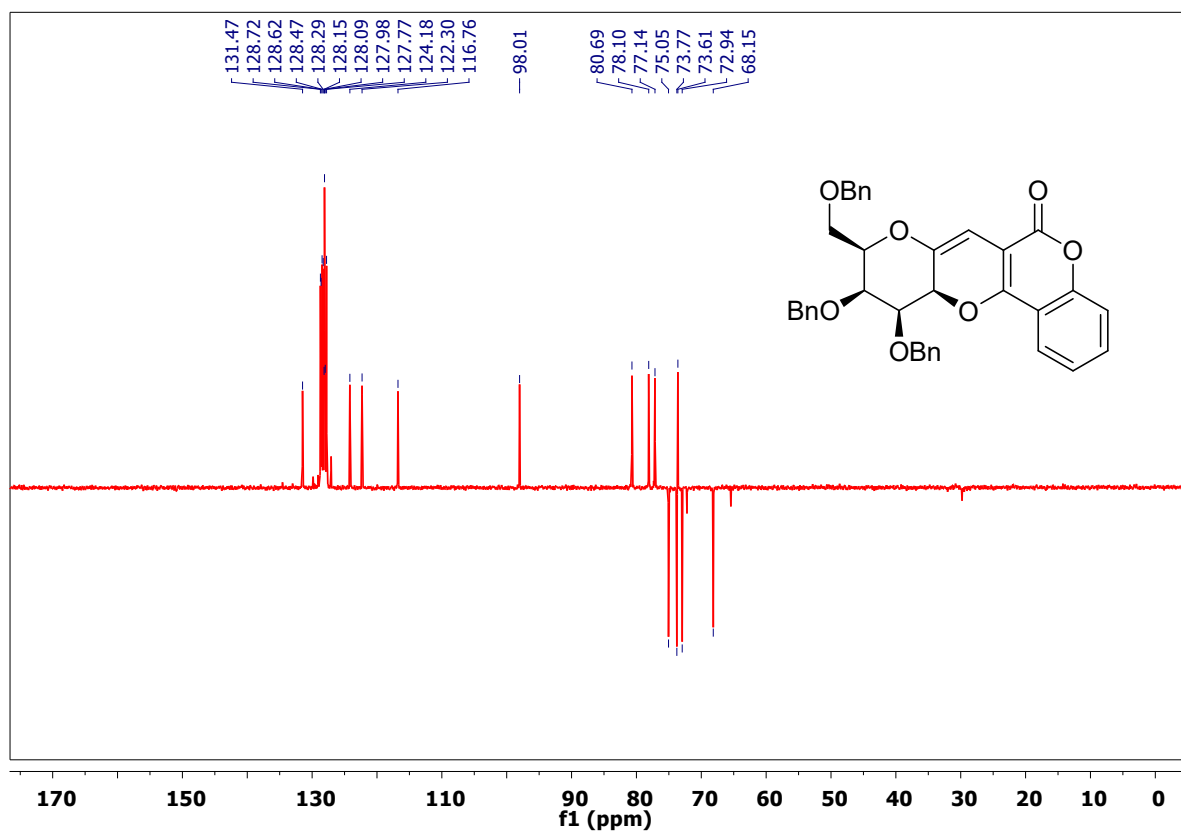

**Figure 8:** DEPT-135 NMR spectrum of compound **4a** (100.6 MHz,  $\text{CDCl}_3$ )

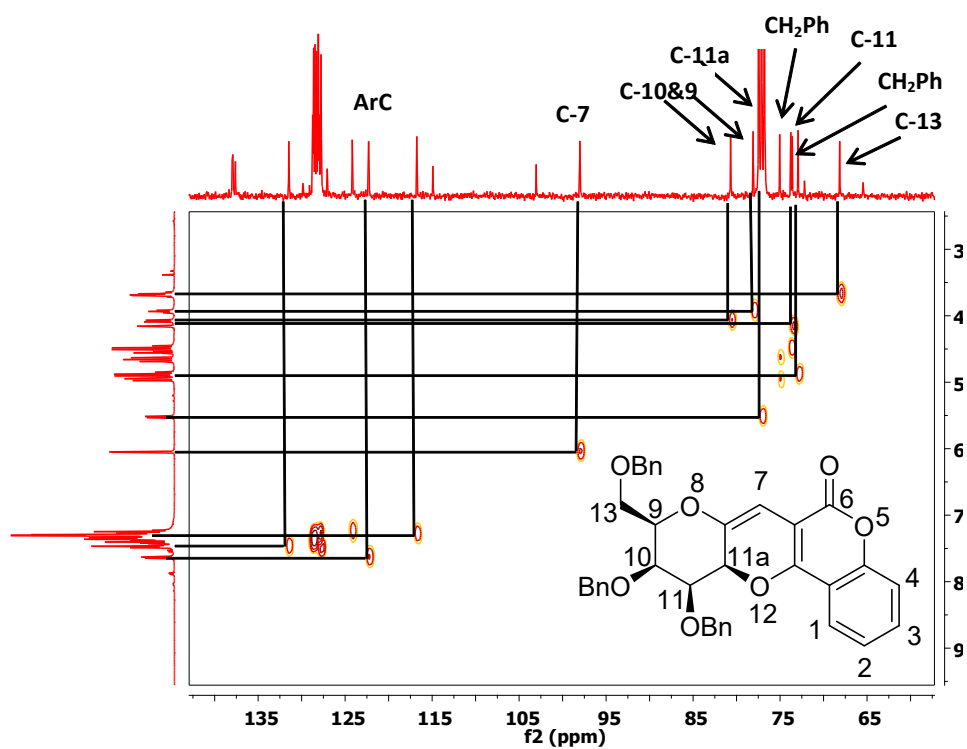

**Figure 9:**  $^1\text{H}$ - $^{13}\text{C}$  HETCOR NMR spectrum of compound **4a** (400 MHz,  $\text{CDCl}_3$ )

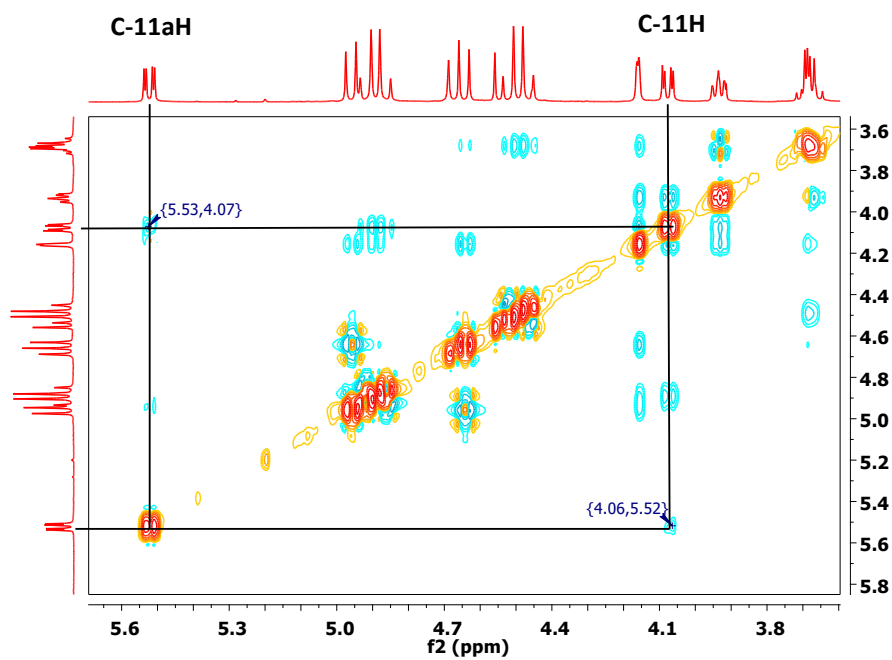

**Figure 10:**  $^1\text{H}$ - $^1\text{H}$  NOESY NMR spectrum of compound **4a** (400 MHz,  $\text{CDCl}_3$ )



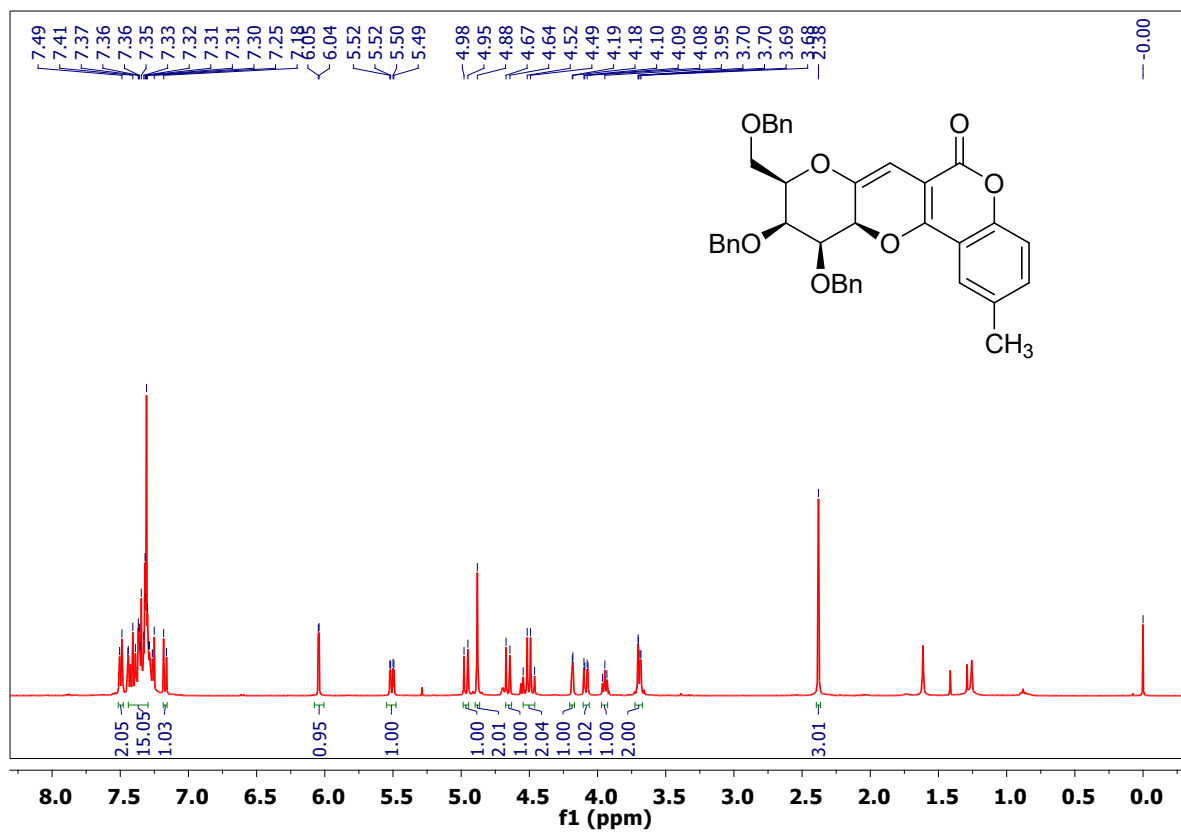

Figure 11: <sup>1</sup>H NMR spectrum of compound **4b** (400 MHz, CDCl<sub>3</sub>)

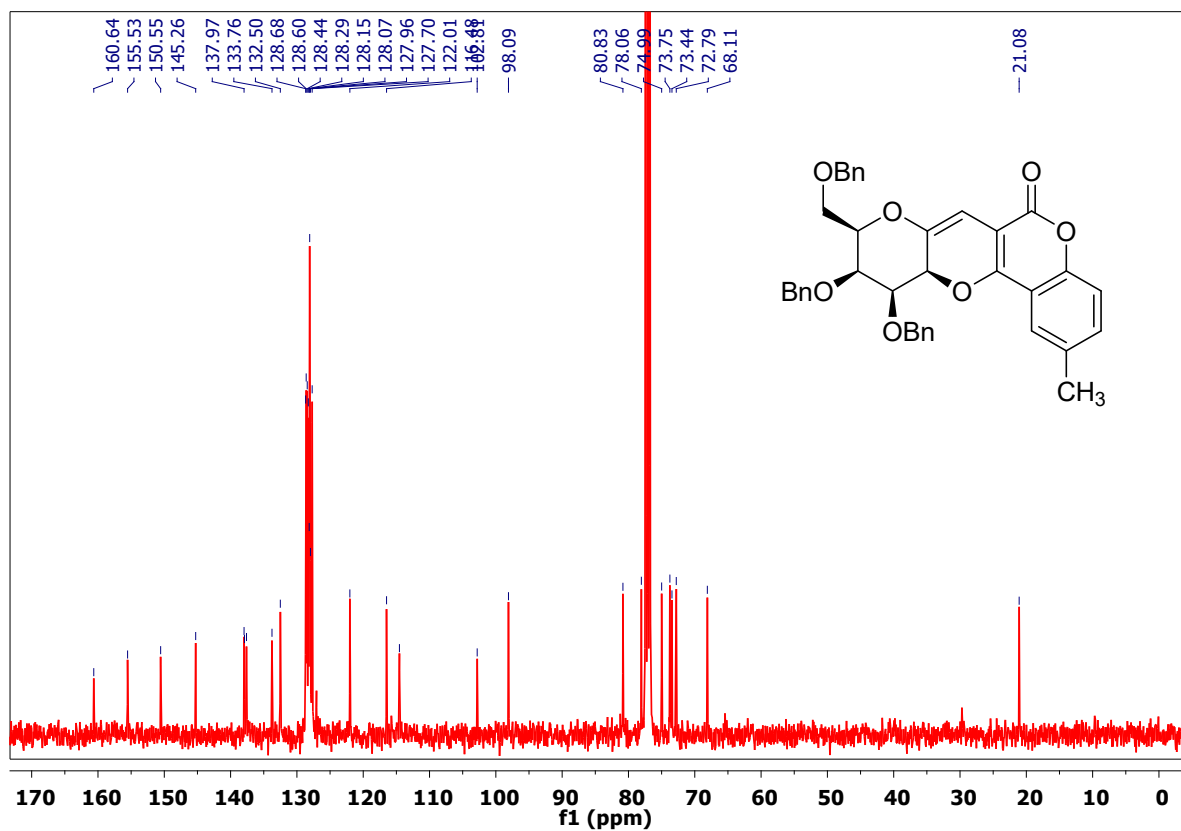

Figure 12:  $^{13}\text{C}$  NMR spectrum of compound **4b** (100.6 MHz,  $\text{CDCl}_3$ )

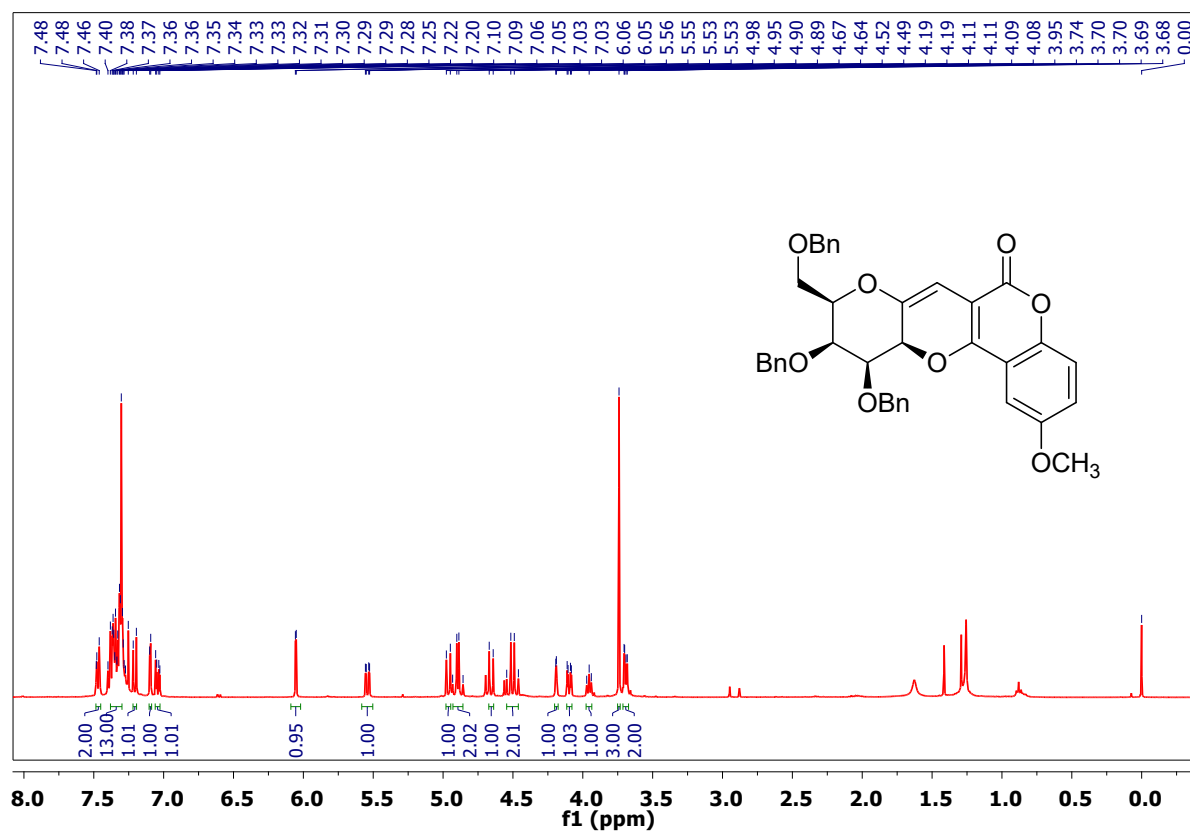

Figure 13:  $^1\text{H}$  NMR spectrum of compound **4c** (400 MHz,  $\text{CDCl}_3$ )

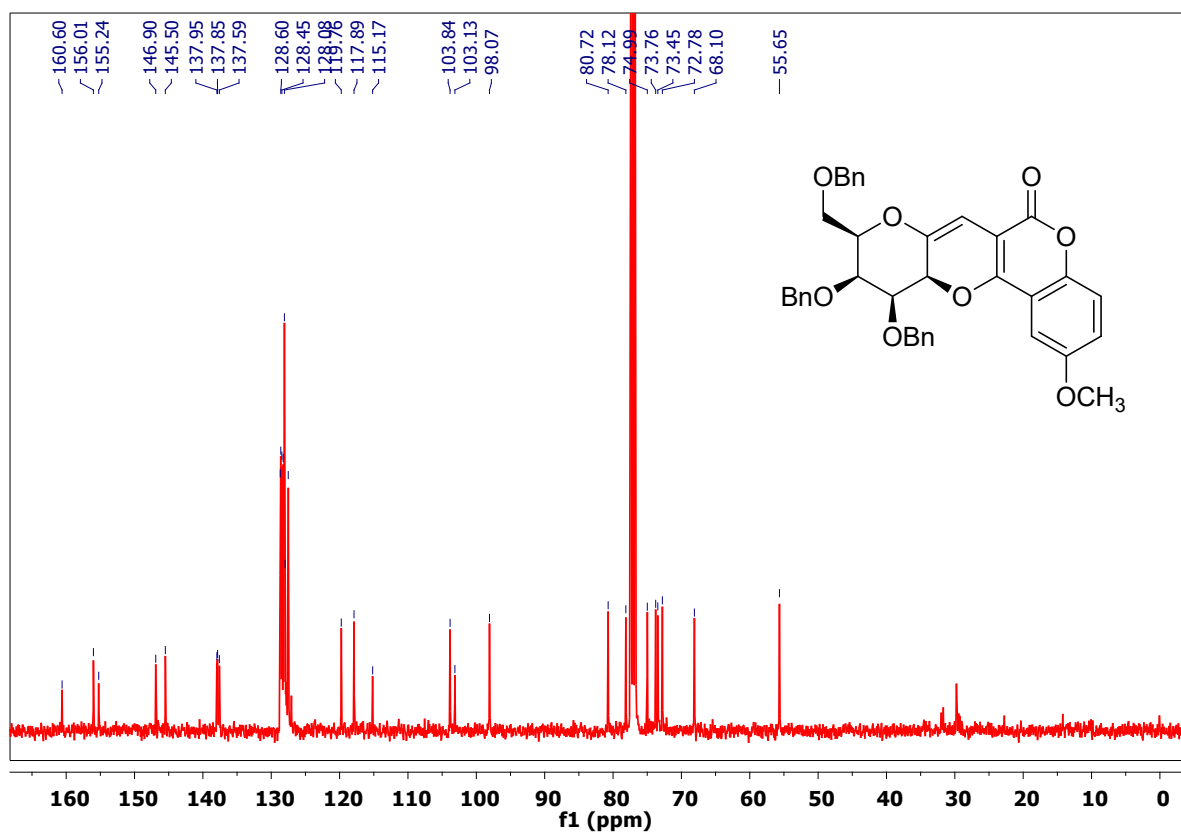

Figure 14: <sup>13</sup>C NMR spectrum of compound 4c (100.6 MHz, CDCl<sub>3</sub>)

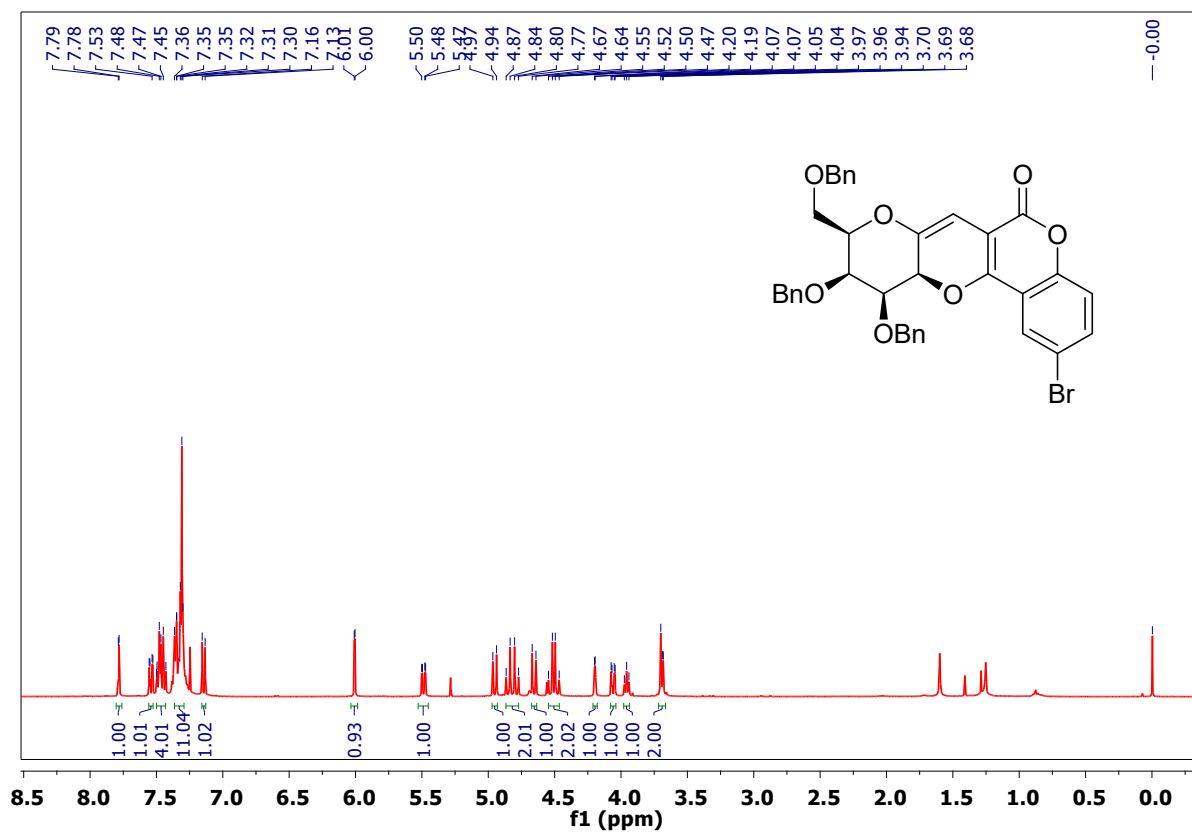

**Figure 15:**  $^1\text{H}$  NMR spectrum of compound **4d** (400 MHz,  $\text{CDCl}_3$ )

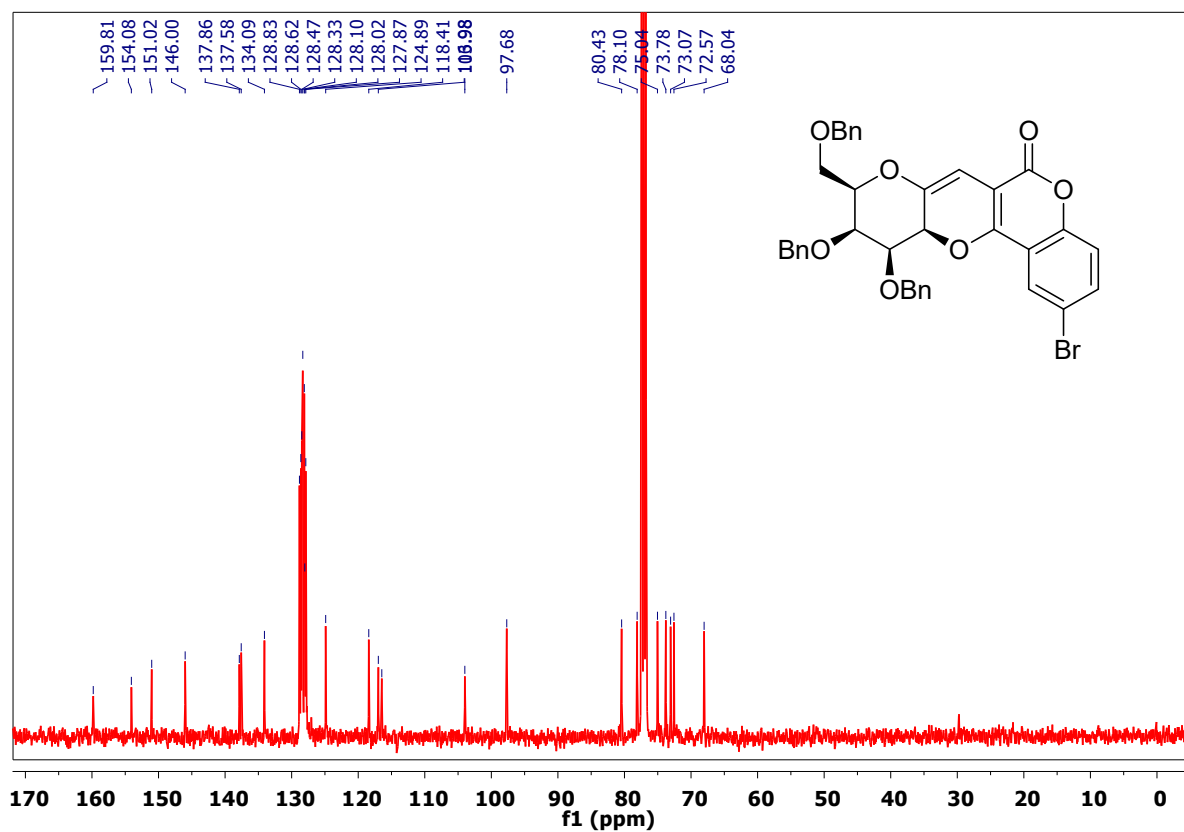

**Figure 16:**  $^{13}\text{C}$  NMR spectrum of compound **4d** (100.6 MHz,  $\text{CDCl}_3$ )

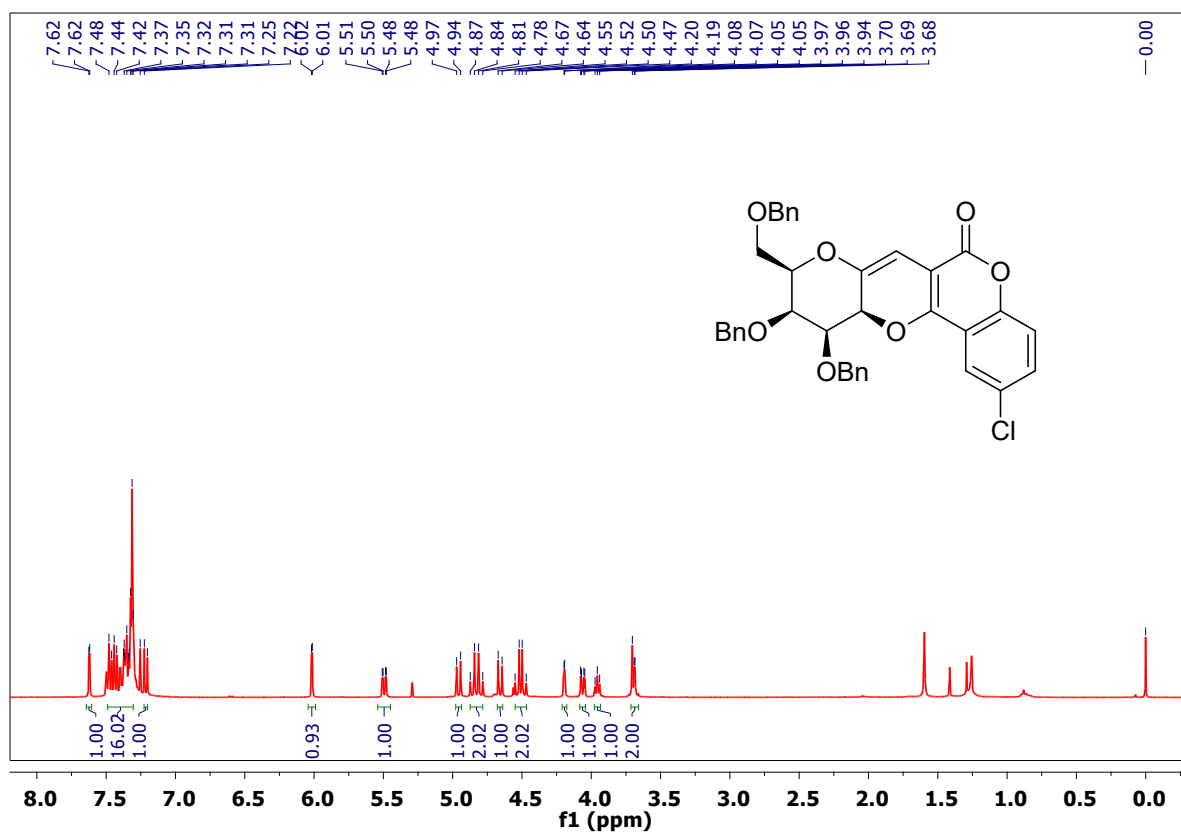

Figure 17: <sup>1</sup>H NMR spectrum of compound 4e (400 MHz, CDCl<sub>3</sub>)

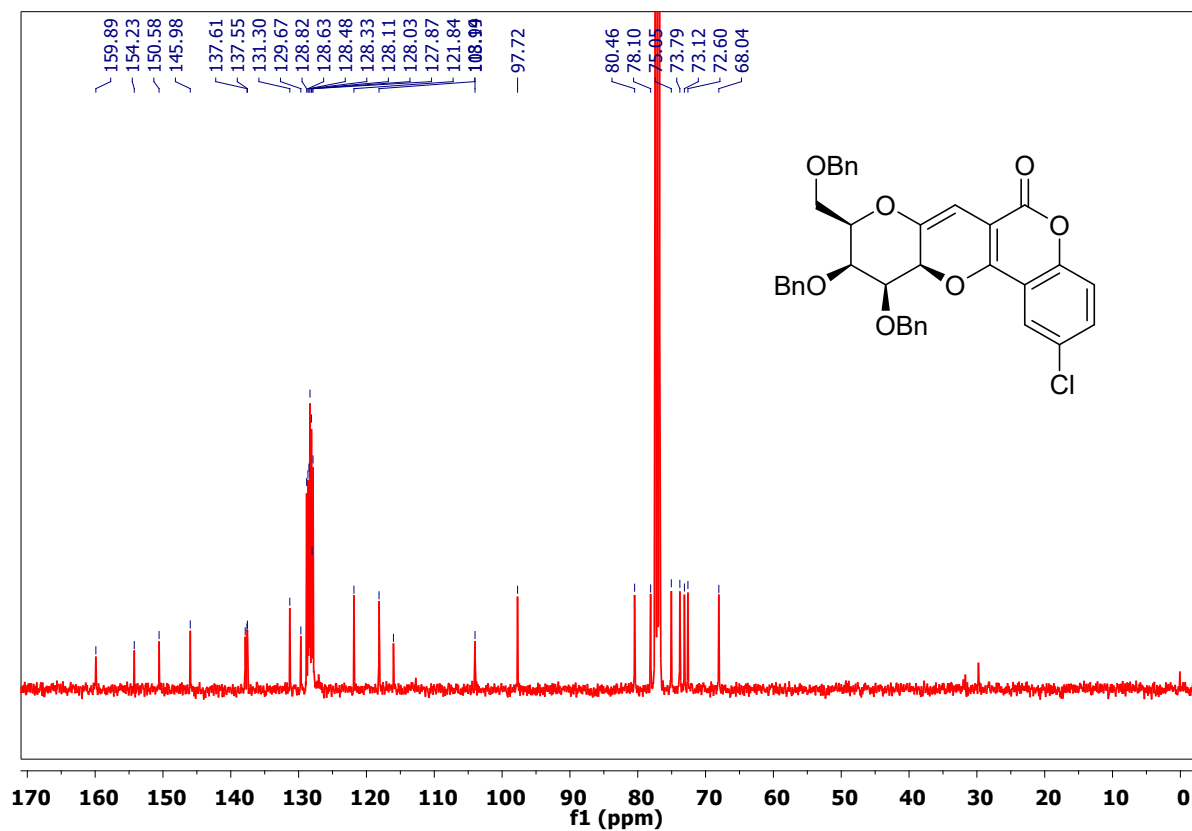

Figure 18:  $^{13}\text{C}$  NMR spectrum of compound **4e** (100.6 MHz,  $\text{CDCl}_3$ )

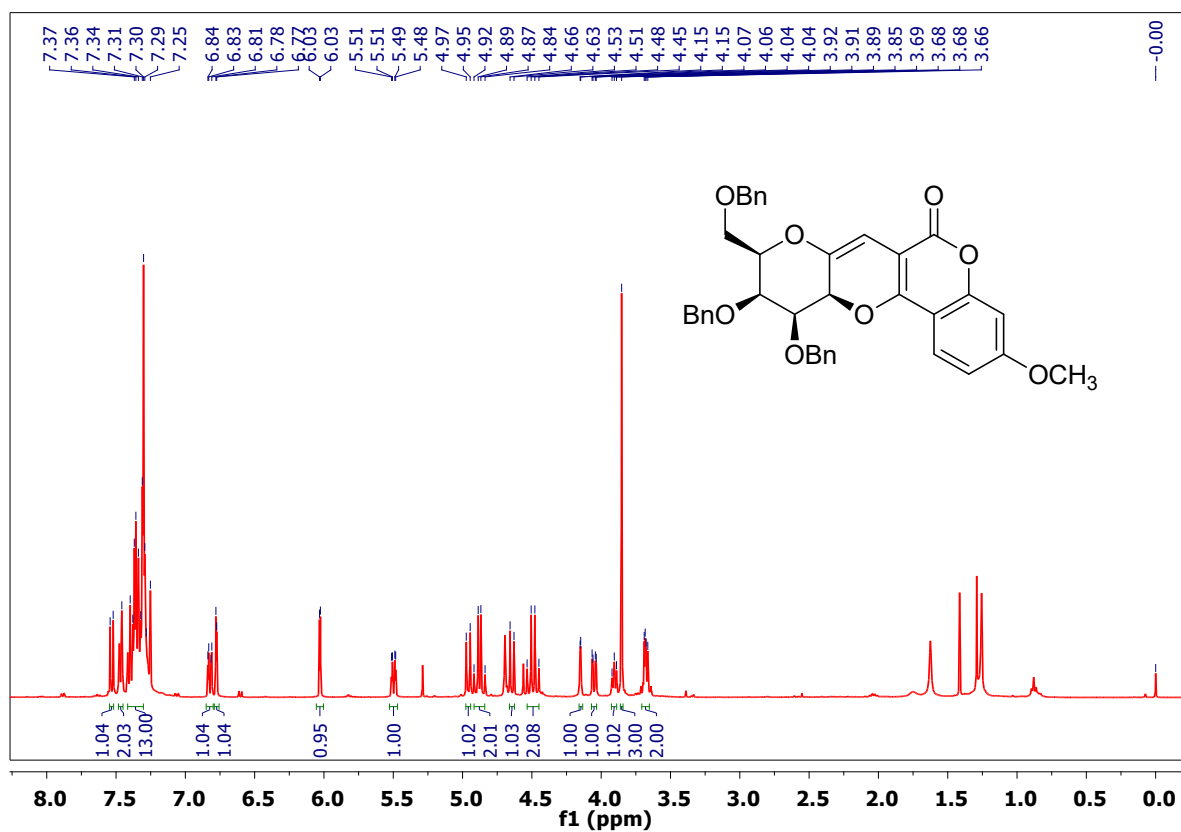

Figure 19:  $^1\text{H}$  NMR spectrum of compound **4f** (400 MHz,  $\text{CDCl}_3$ )

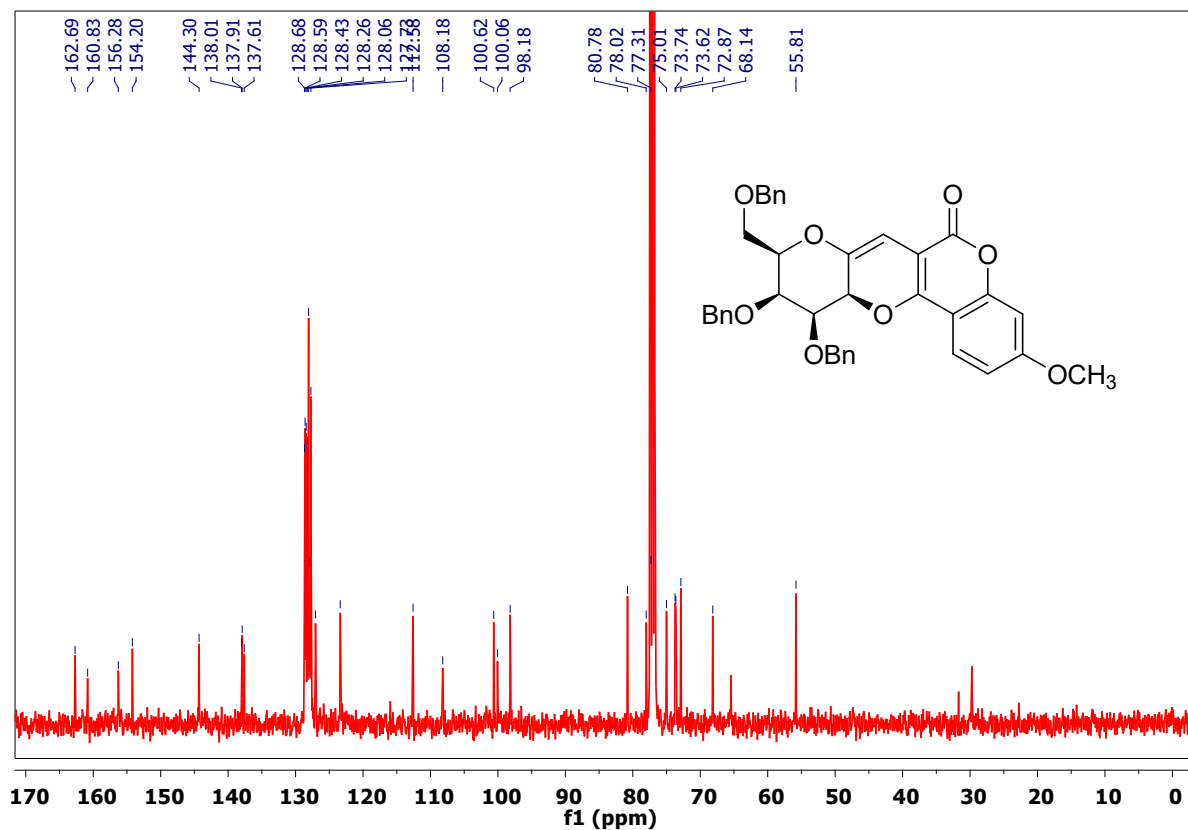

Figure 20: <sup>13</sup>C NMR spectrum of compound 4f (100.6 MHz, CDCl<sub>3</sub>)

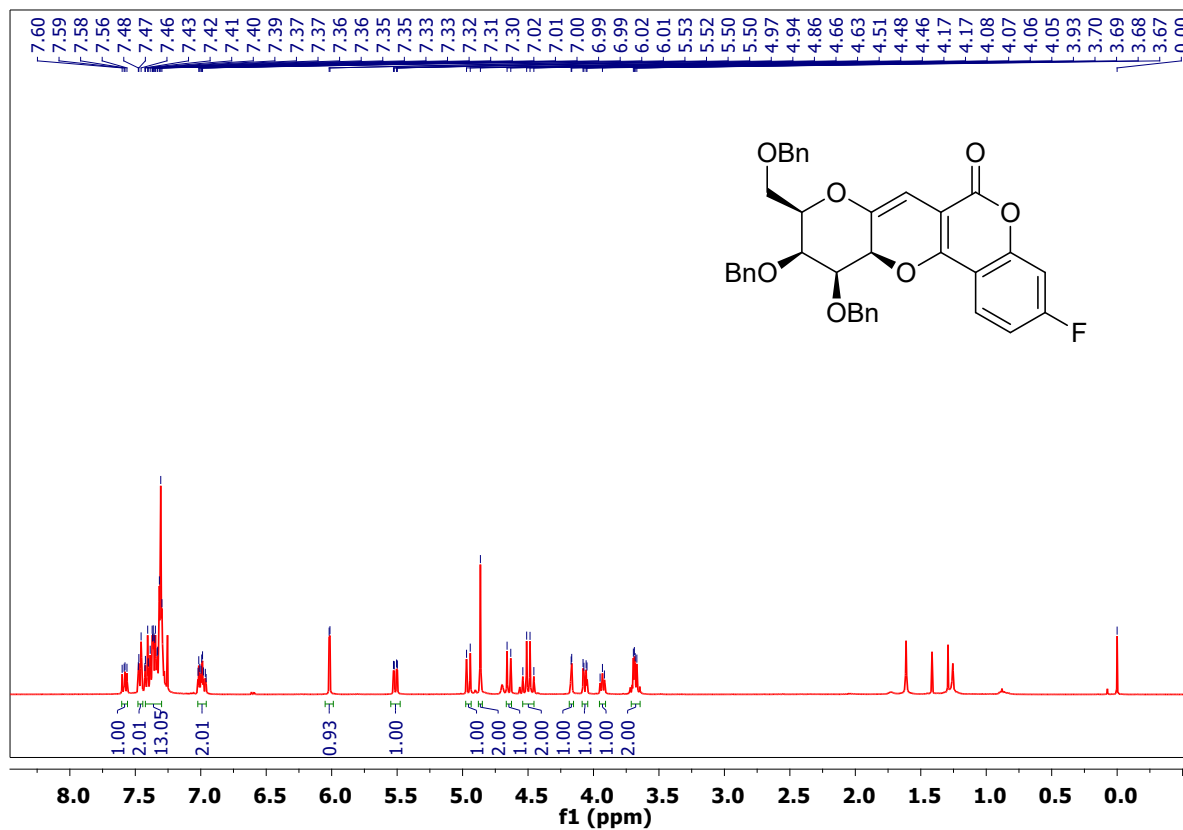

**Figure 21:**  $^1\text{H}$  NMR spectrum of compound **4g** (400 MHz,  $\text{CDCl}_3$ )

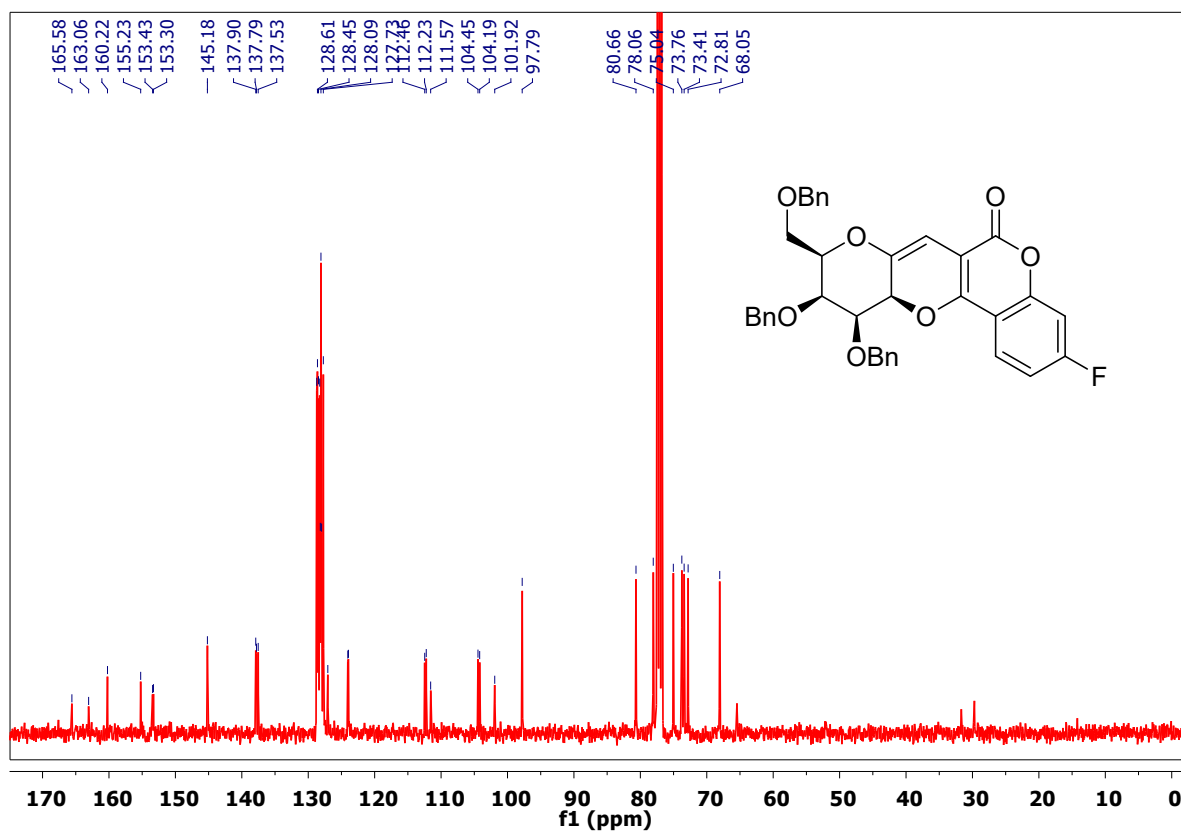

**Figure 22:**  $^{13}\text{C}$  NMR spectrum of compound **4g** (100.6 MHz,  $\text{CDCl}_3$ )



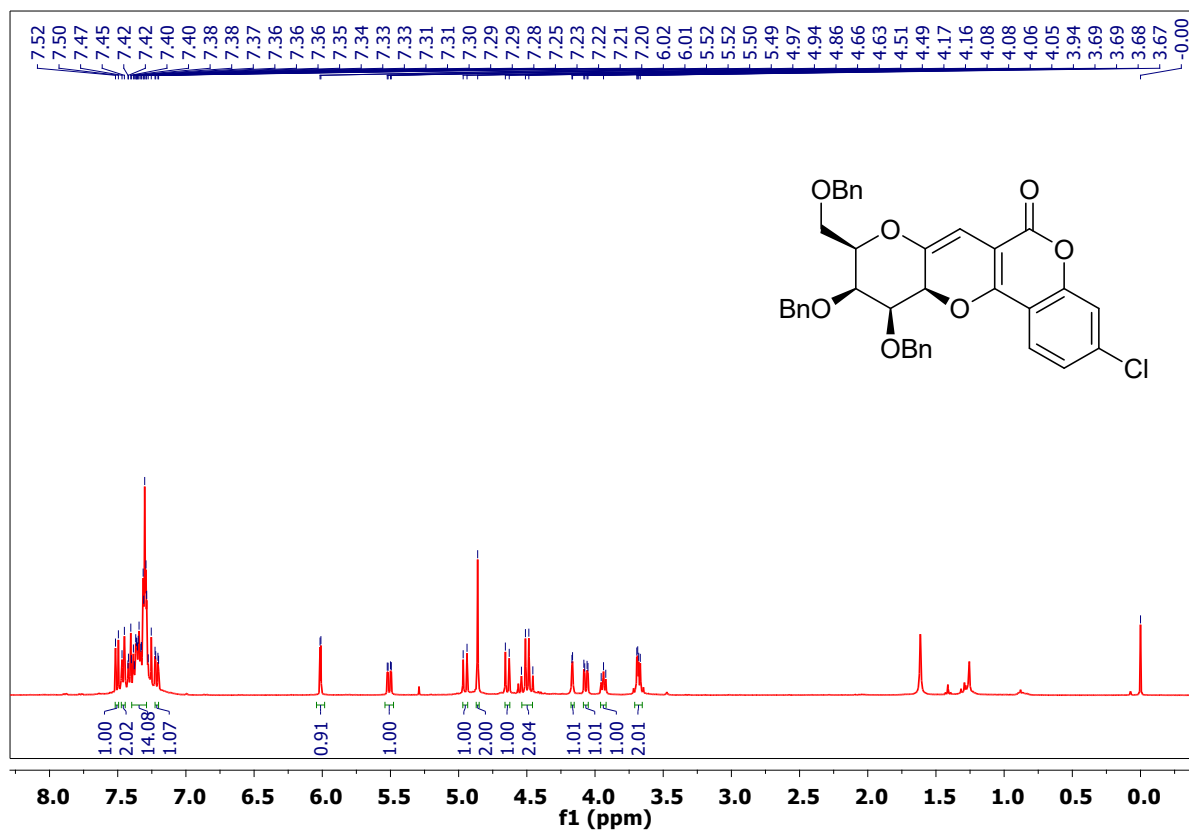

Figure 23: <sup>1</sup>H NMR spectrum of compound **4h** (400 MHz, CDCl<sub>3</sub>)

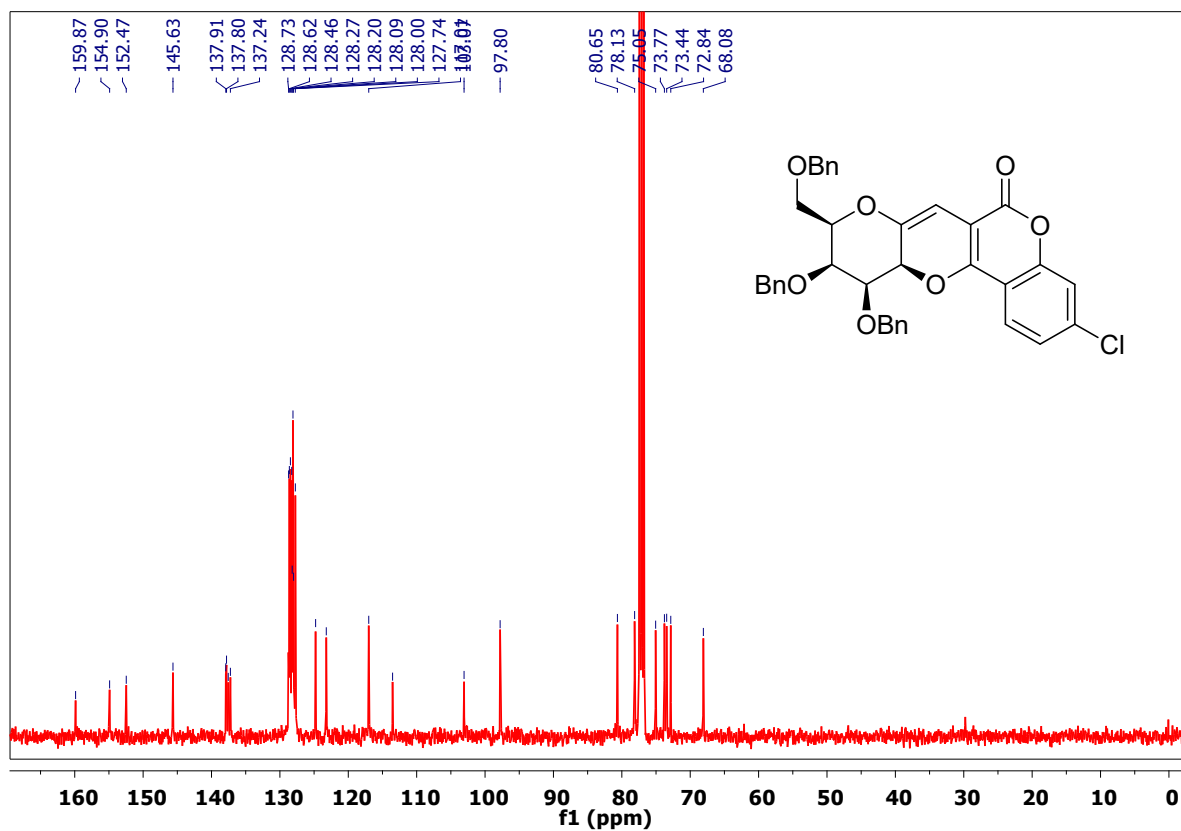

**Figure 24:**  $^{13}\text{C}$  NMR spectrum of compound **4h** (100.6 MHz,  $\text{CDCl}_3$ )

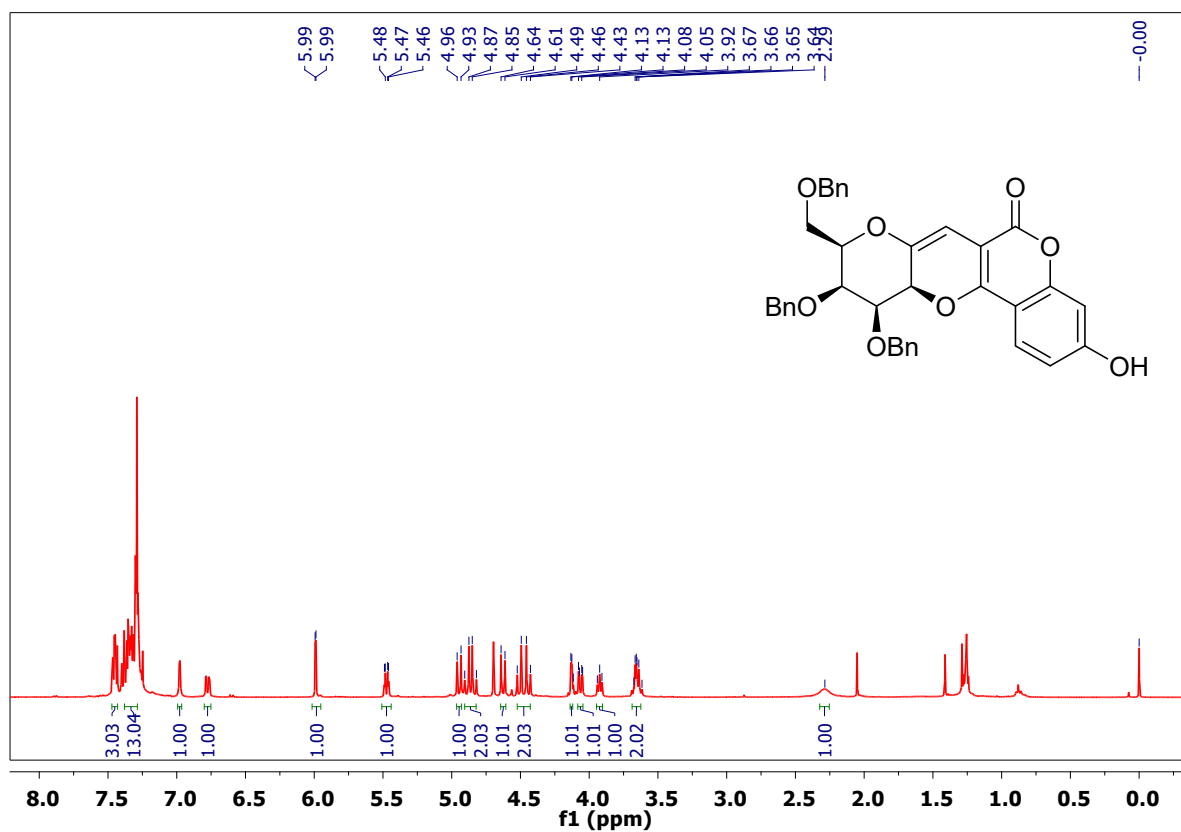

**Figure 25:**  $^1\text{H}$  NMR spectrum of compound **4i** (400 MHz,  $\text{CDCl}_3$ )

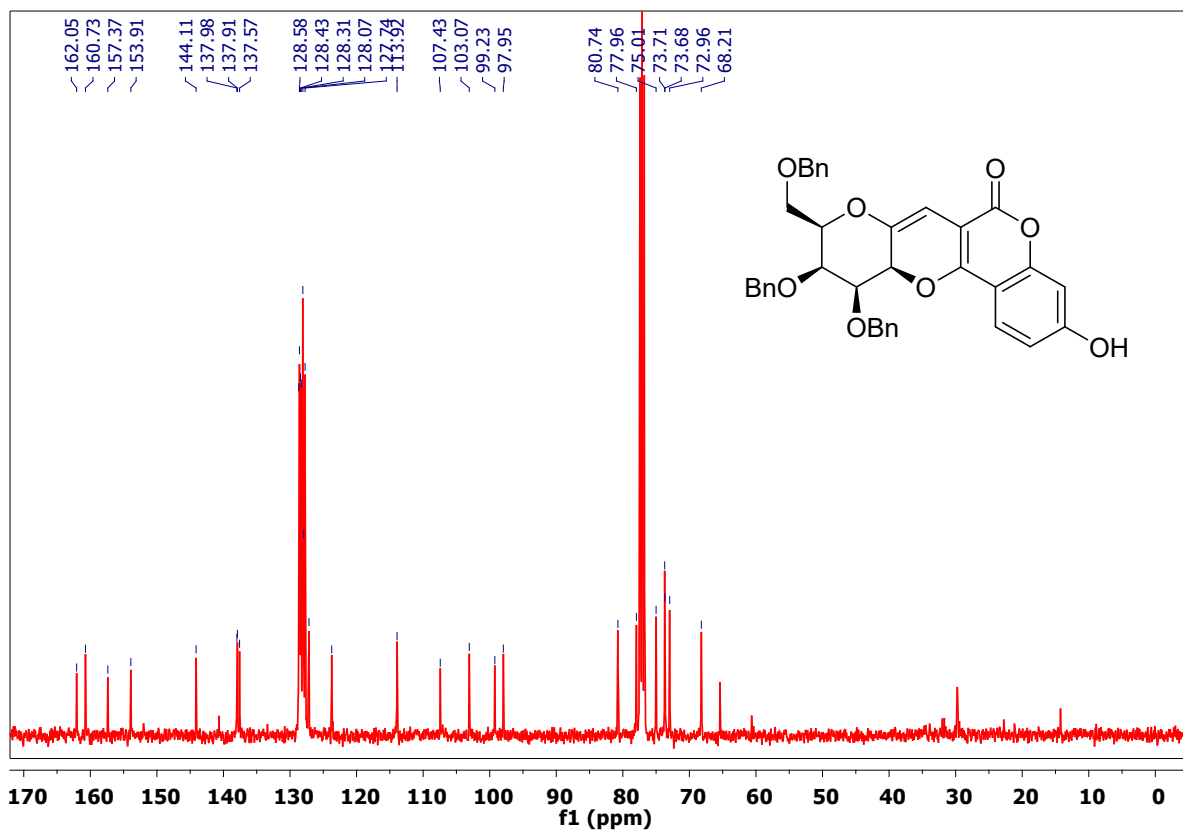

Figure 26: <sup>13</sup>C NMR spectrum of compound 4i (100.6 MHz, CDCl<sub>3</sub>)

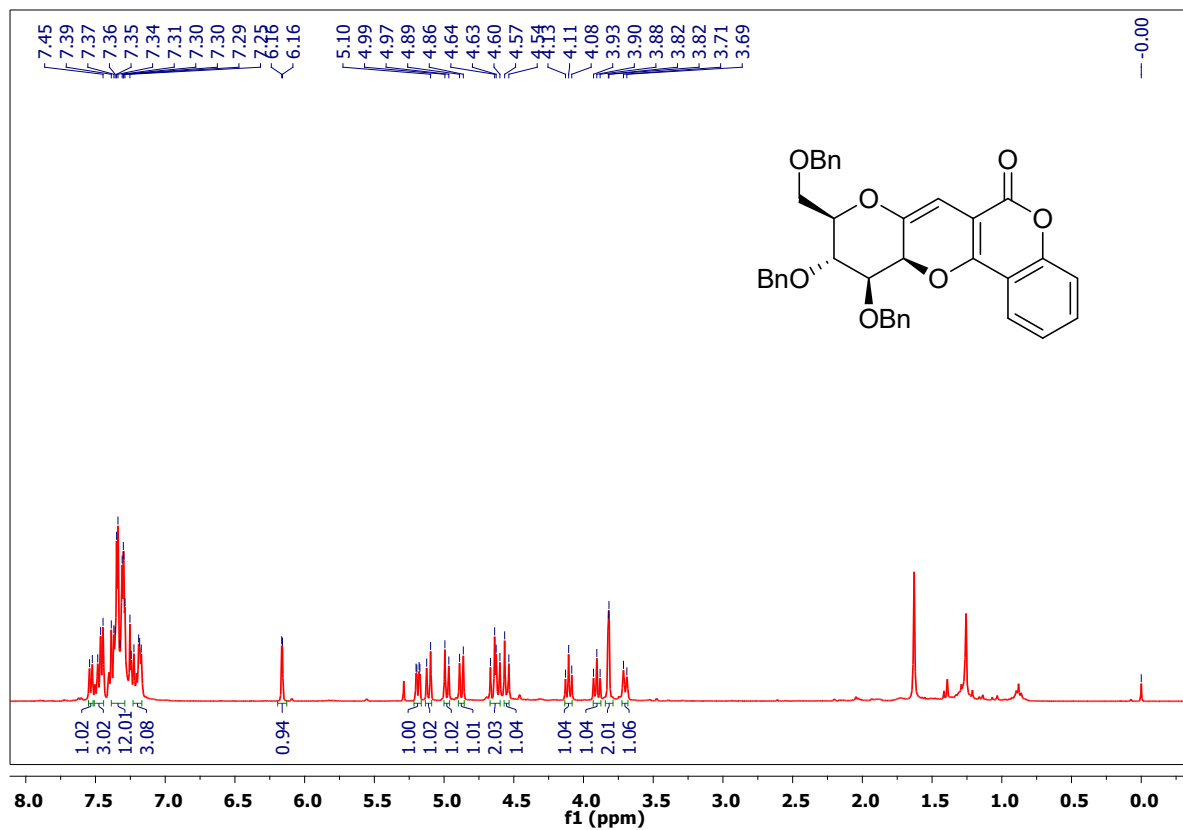

**Figure 27:**  $^1\text{H}$  NMR spectrum of compound **5a** (400 MHz,  $\text{CDCl}_3$ )

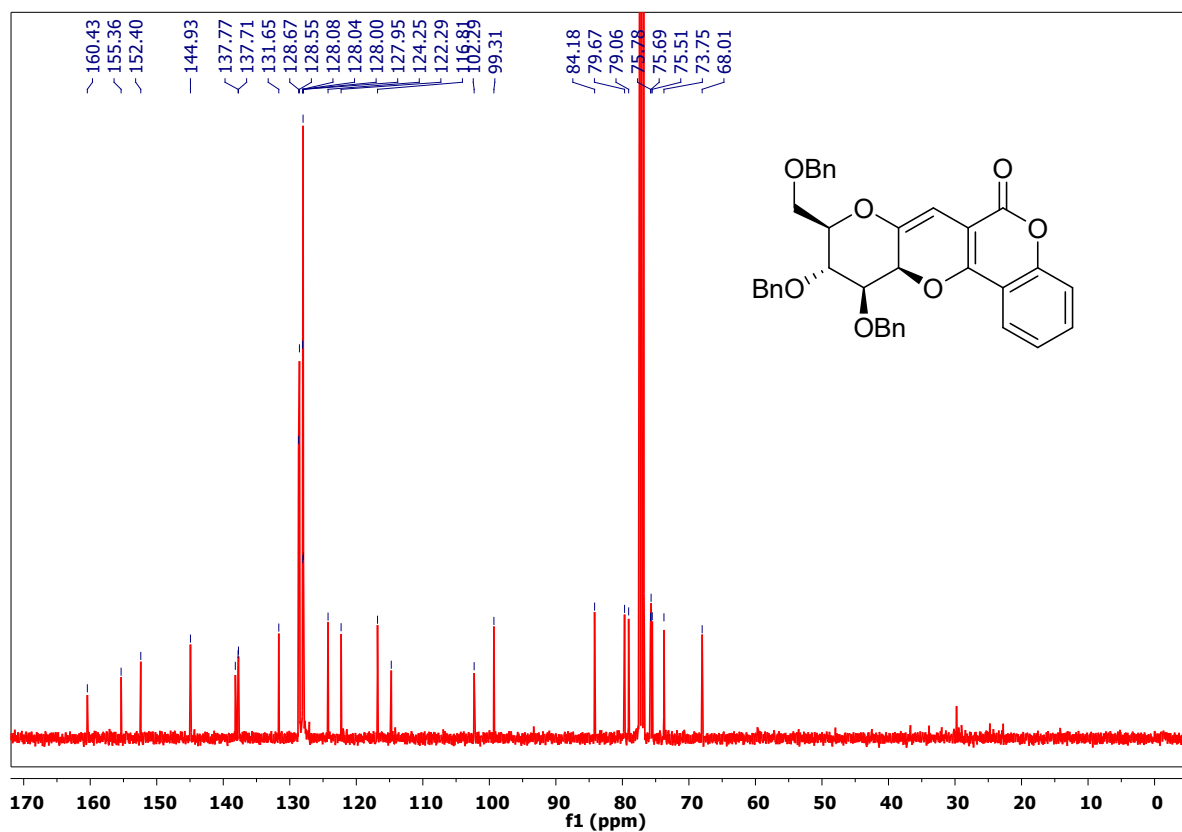

**Figure 28:**  $^{13}\text{C}$  NMR spectrum of compound **5a** (100.6 MHz,  $\text{CDCl}_3$ )

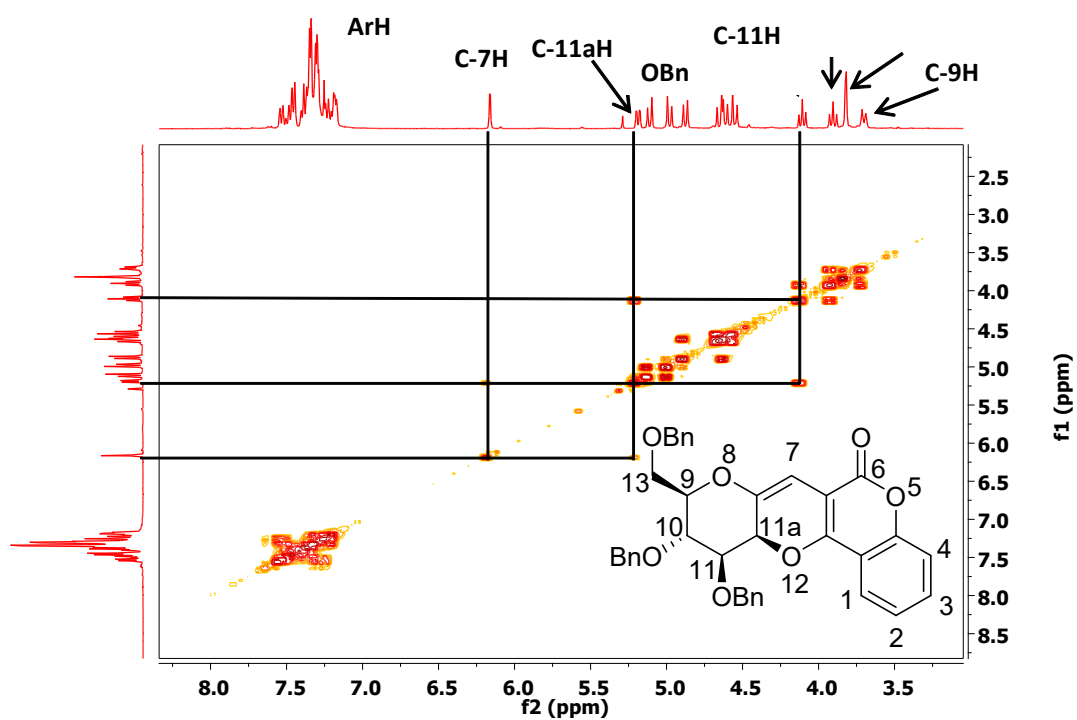

Figure 29:  $^1\text{H}$ - $^1\text{H}$  COSY NMR spectrum of compound **5a** (400 MHz,  $\text{CDCl}_3$ )

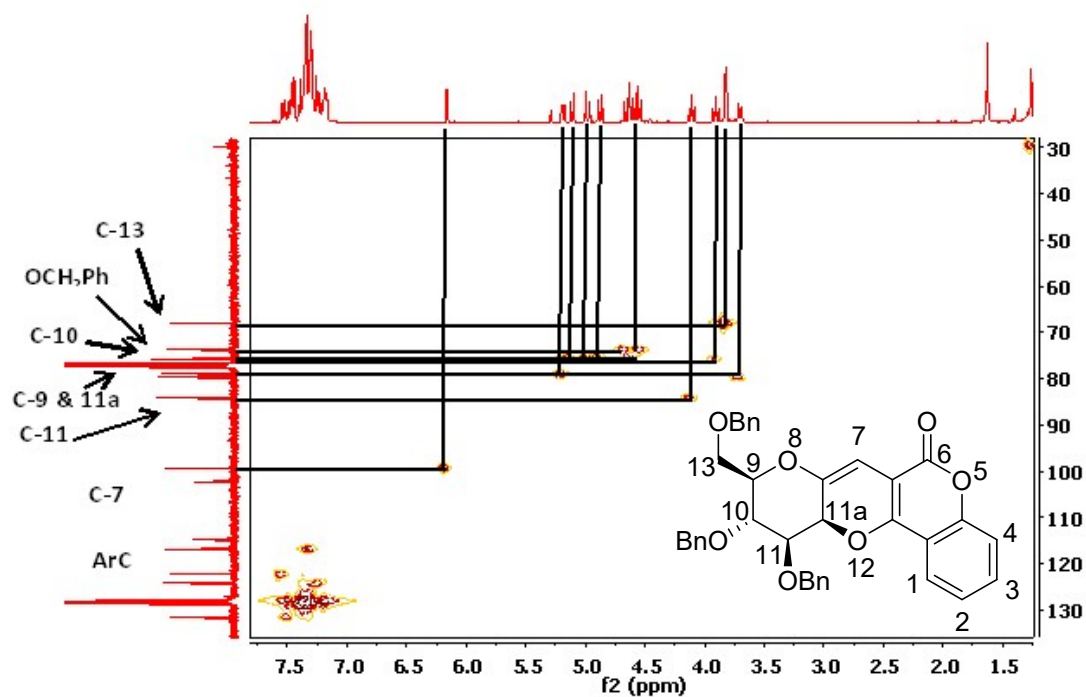

Figure 30:  $^1\text{H}$ - $^{13}\text{C}$  HETCOR NMR spectrum of compound **5a** (400 MHz,  $\text{CDCl}_3$ )

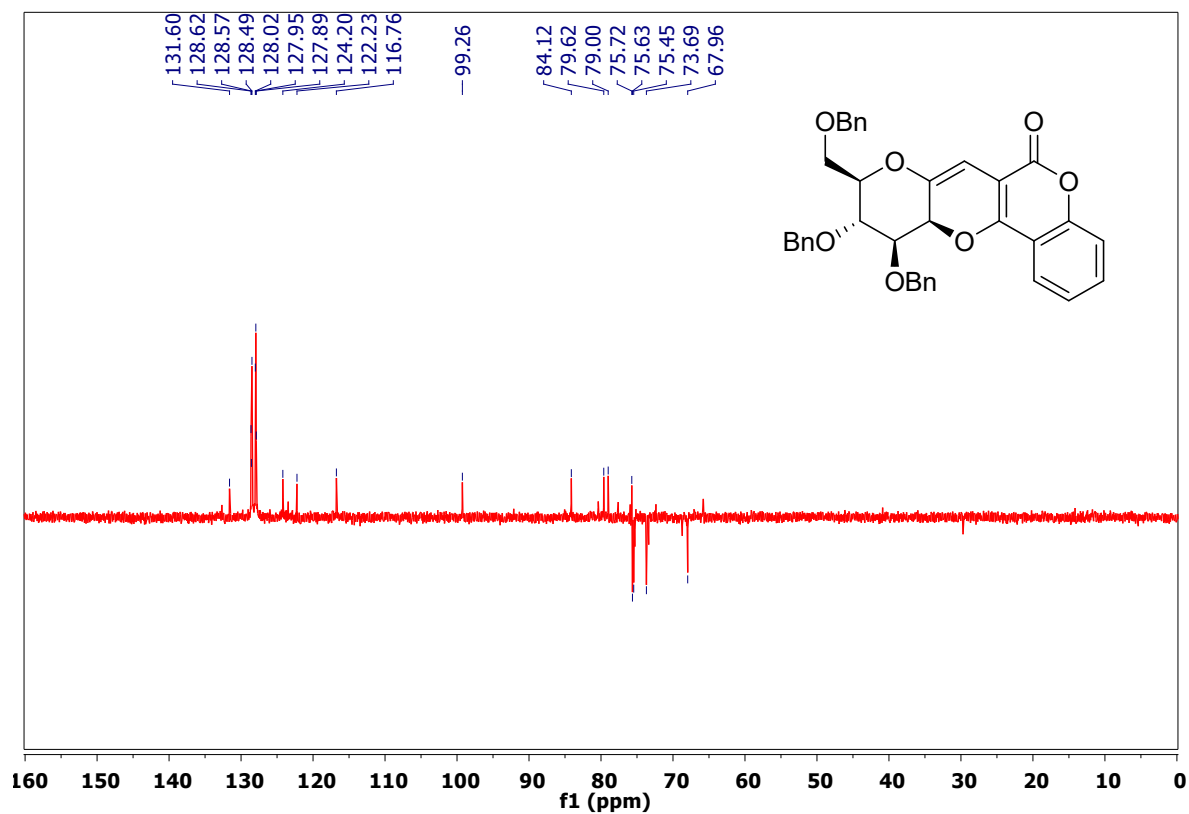

**Figure 31:** DEPT-135 NMR spectrum of compound **5a** (400 MHz, CDCl<sub>3</sub>)

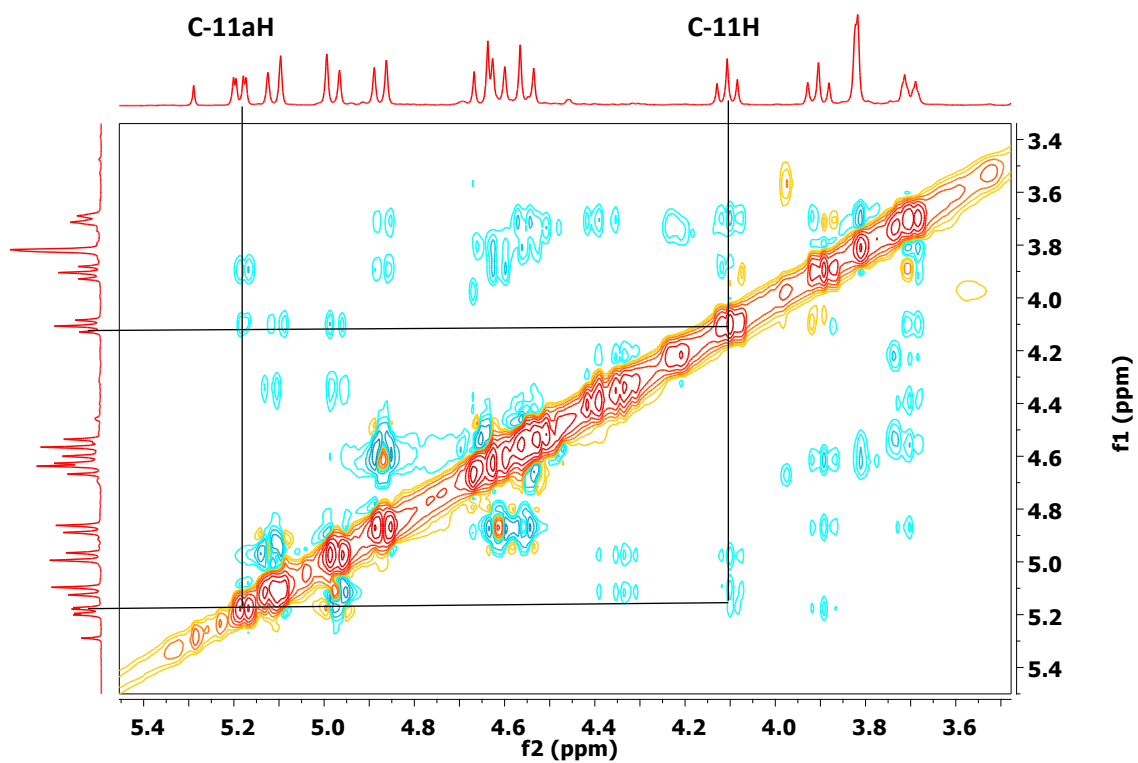

**Figure 32:** <sup>1</sup>H-<sup>1</sup>H NOESY NMR spectrum of compound **5a** (400 MHz, CDCl<sub>3</sub>)

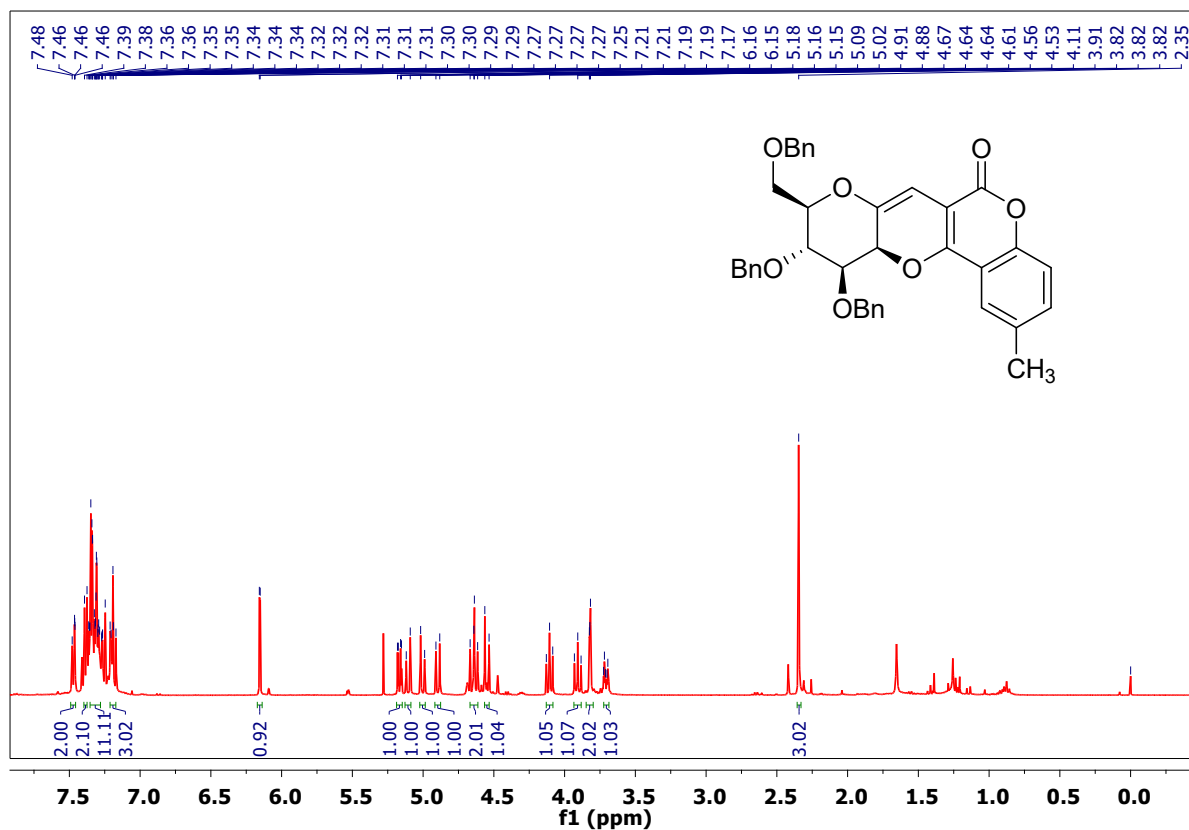

**Figure 33:  $^1\text{H}$  NMR spectrum of compound **5b** (400 MHz,  $\text{CDCl}_3$ )**

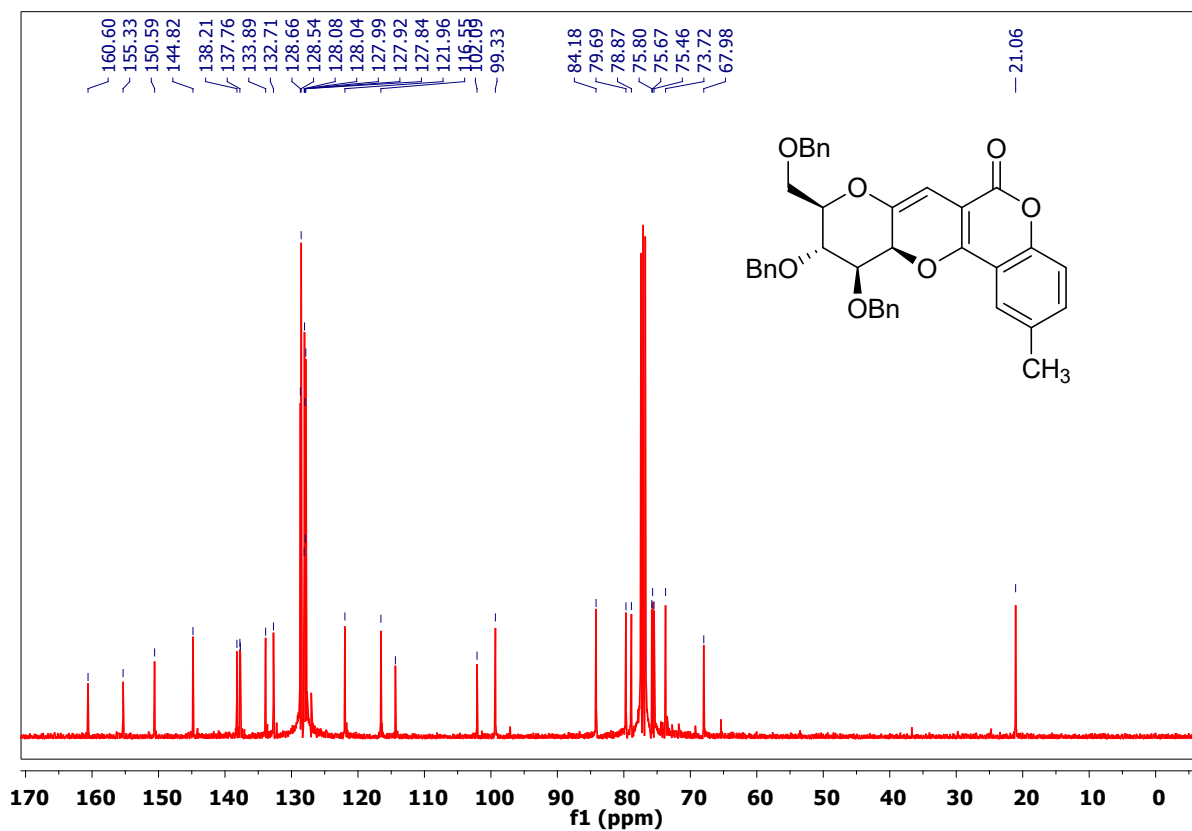

**Figure 34:**  $^{13}\text{C}$  NMR spectrum of compound **5b** (100.6 MHz,  $\text{CDCl}_3$ )

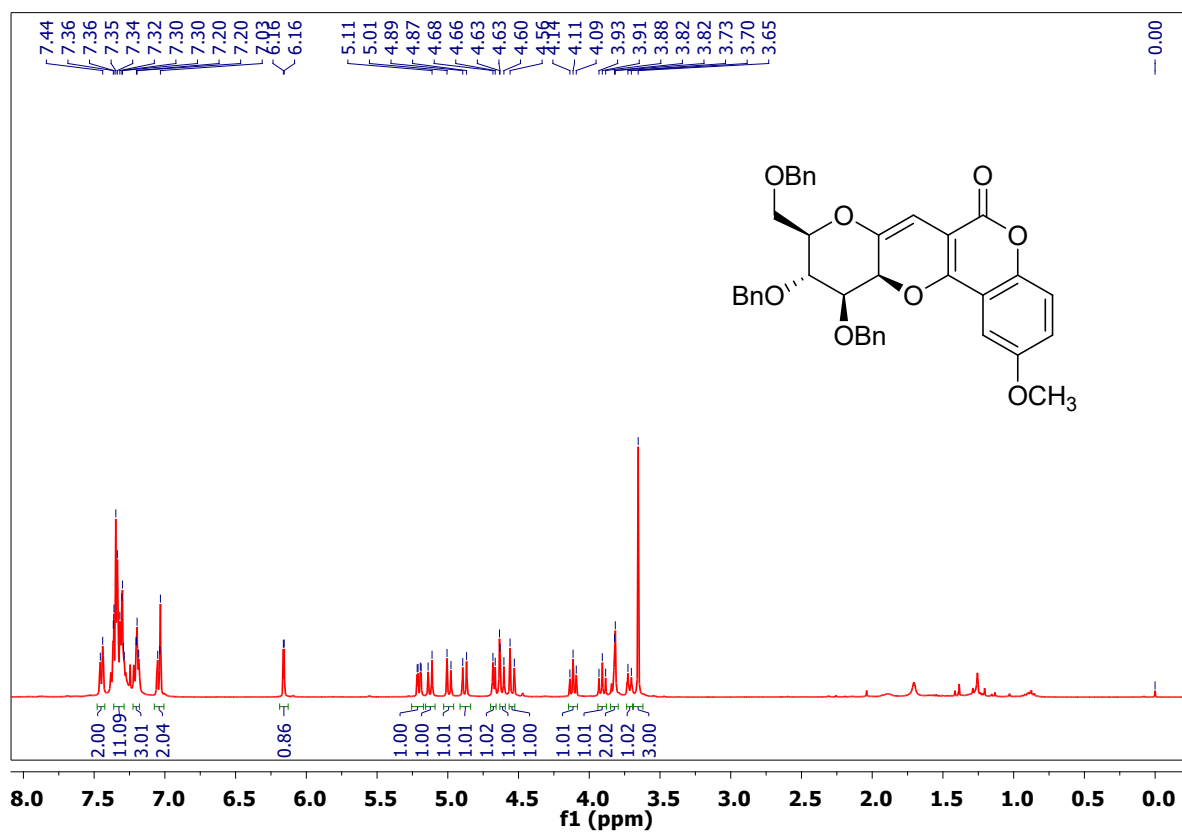

**Figure 35:**  $^1\text{H}$  NMR spectrum of compound **5c** (400 MHz,  $\text{CDCl}_3$ )



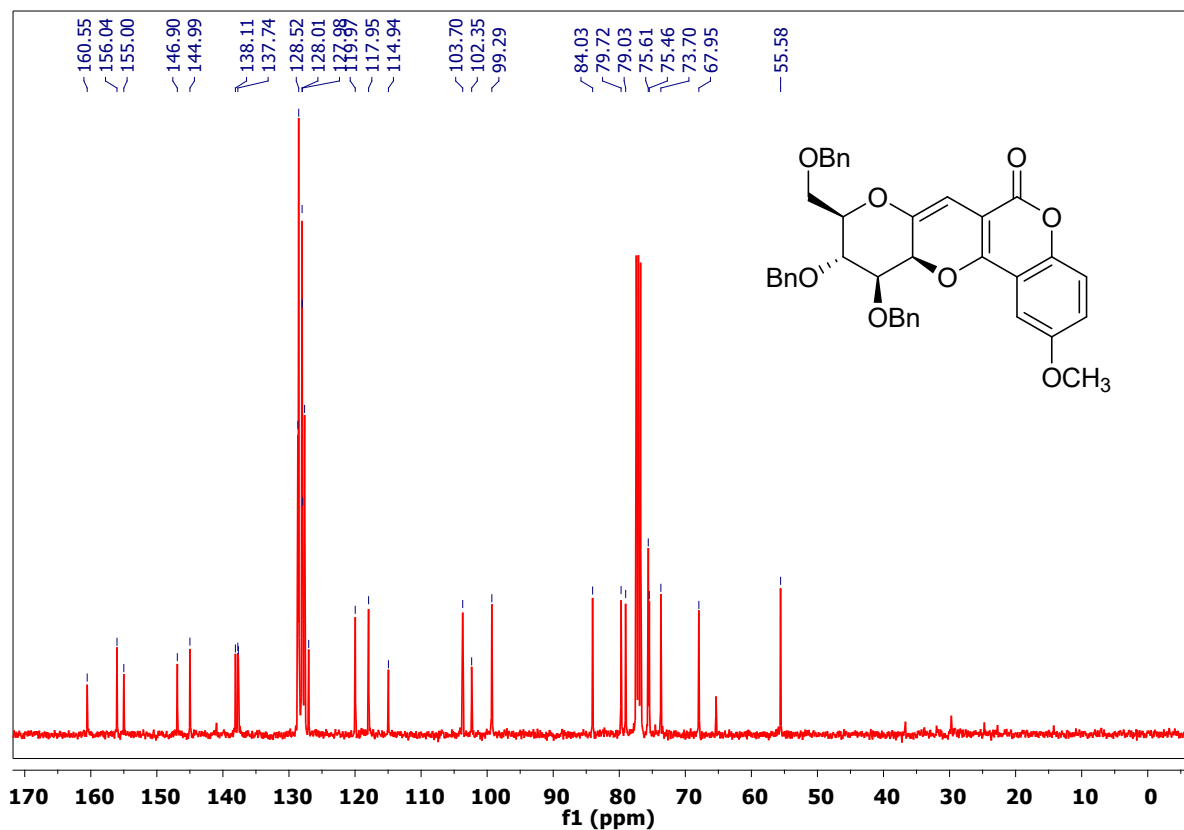

Figure 36: <sup>13</sup>C NMR spectrum of compound 5c (100.6 MHz, CDCl<sub>3</sub>)

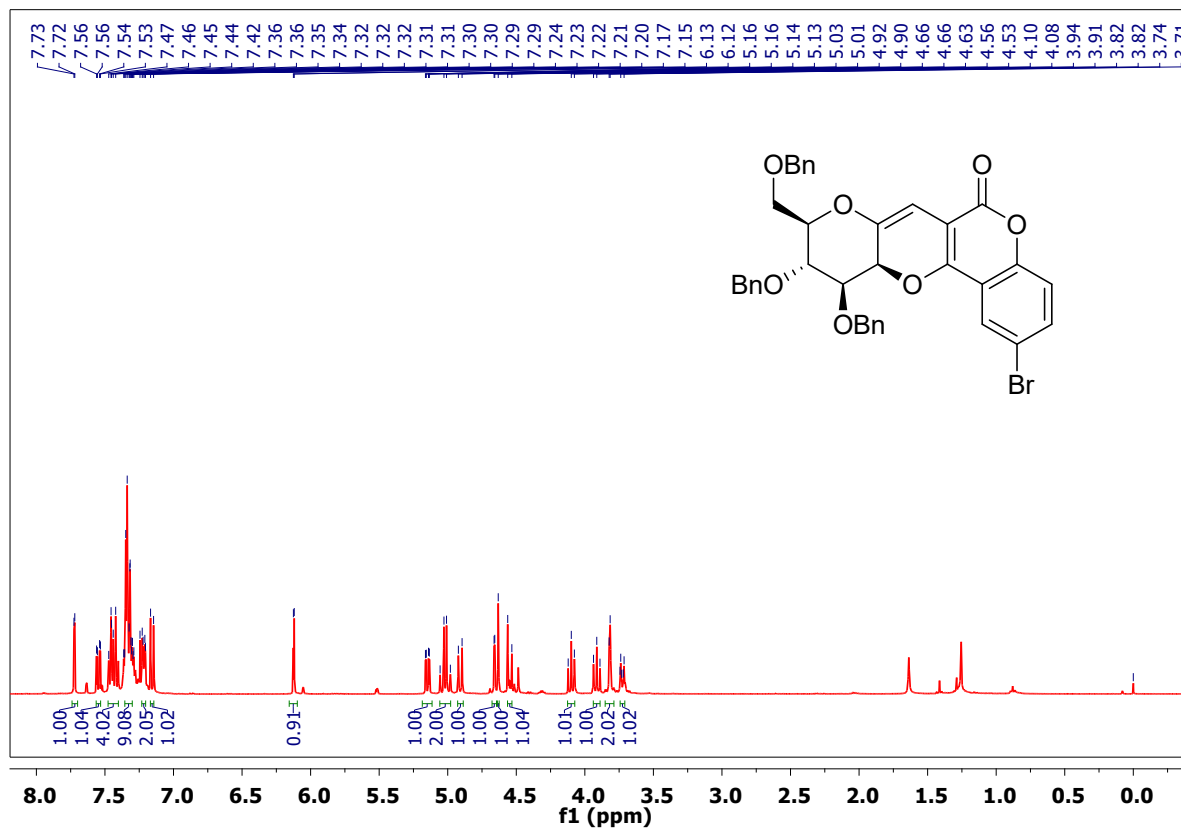

**Figure 37:**  $^1\text{H}$  NMR spectrum of compound **5d** (400 MHz,  $\text{CDCl}_3$ )

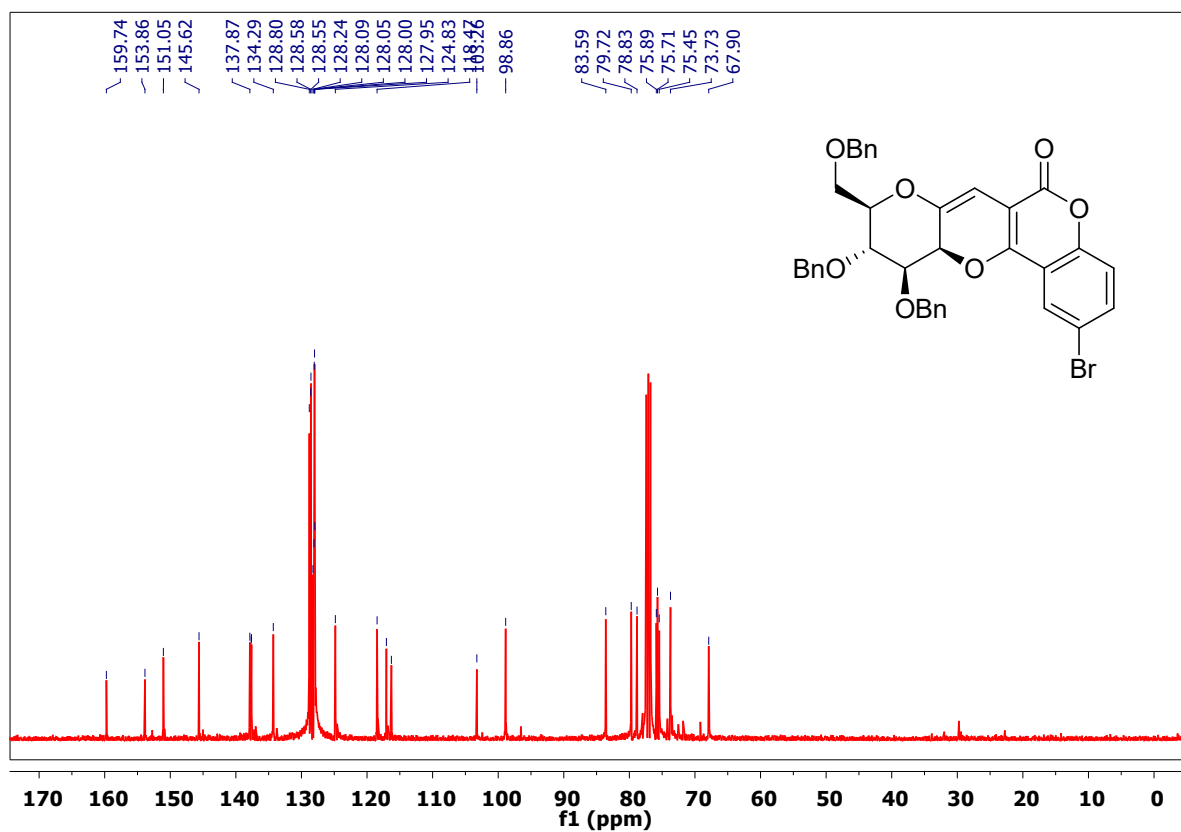

**Figure 38:**  $^{13}\text{C}$  NMR spectrum of compound **5d** (100.6 MHz,  $\text{CDCl}_3$ )

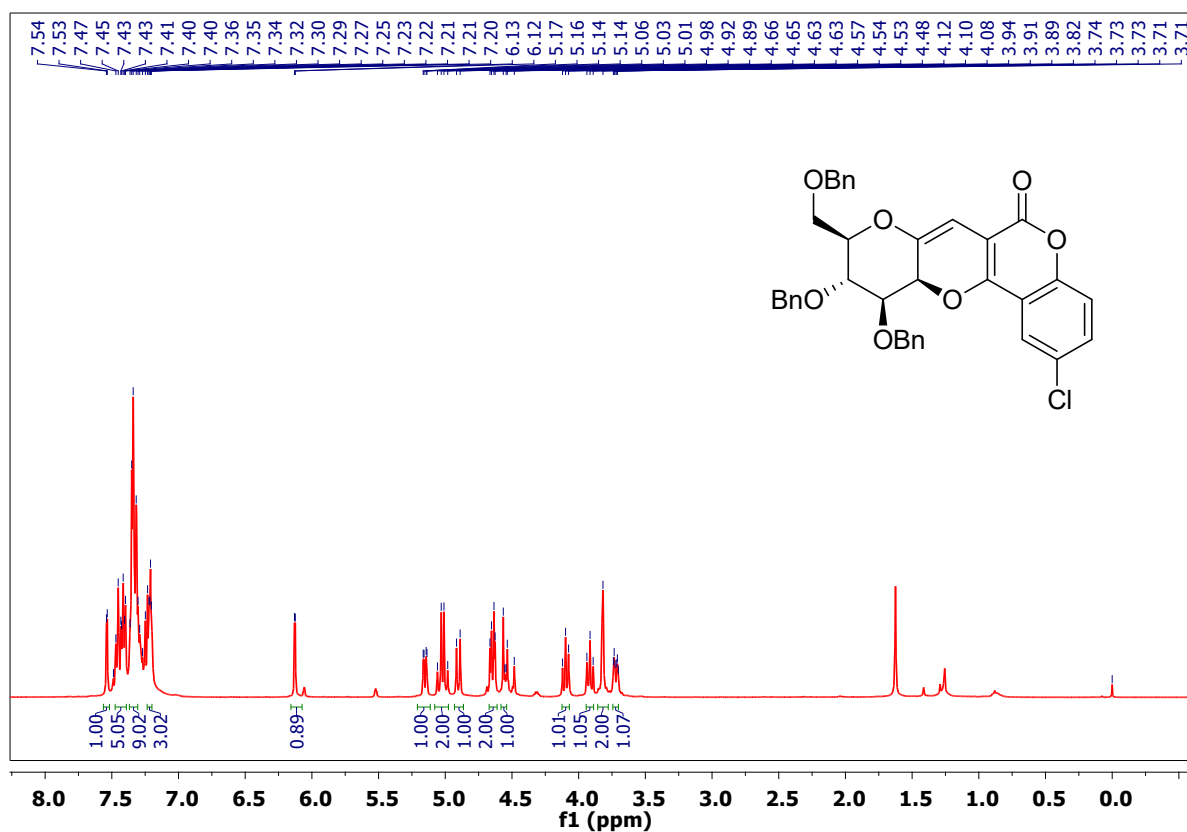

Figure 39:  $^1\text{H}$  NMR spectrum of compound 5e (400 MHz,  $\text{CDCl}_3$ )

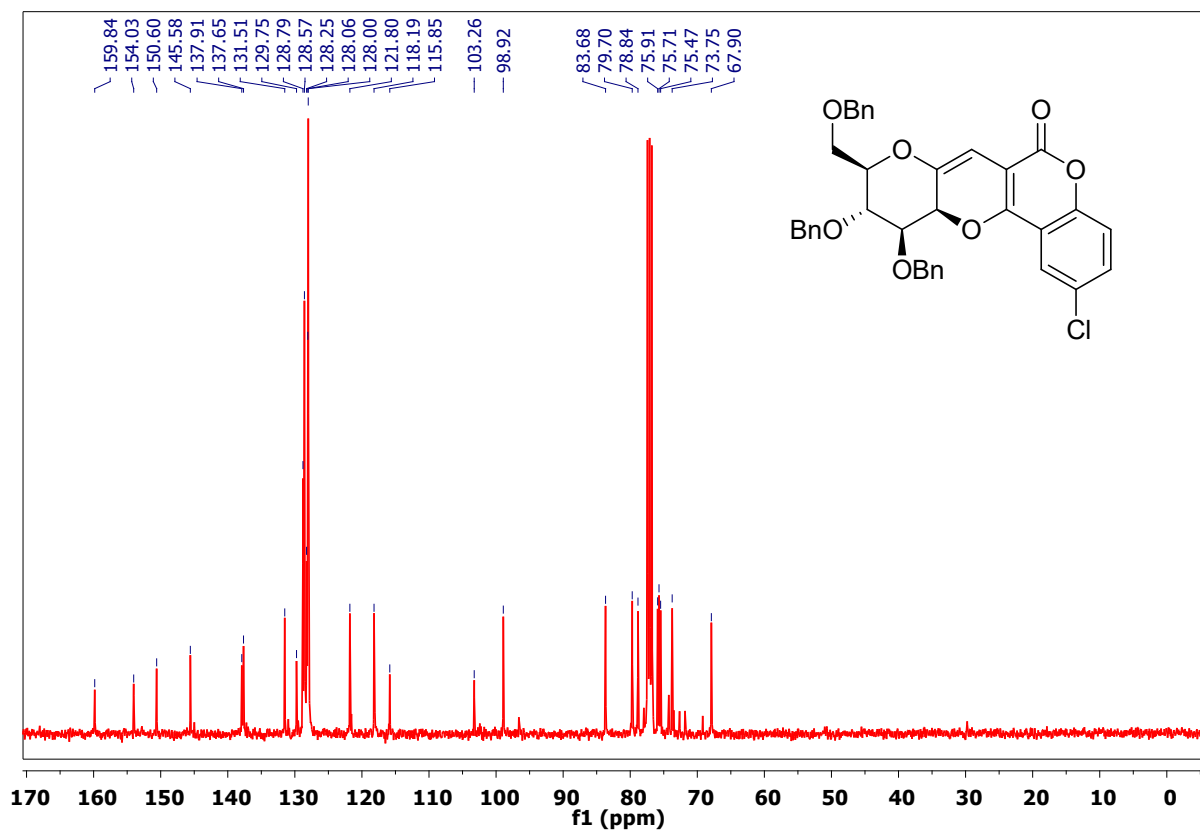

Figure 40:  $^{13}\text{C}$  NMR spectrum of compound **5e** (100.6 MHz,  $\text{CDCl}_3$ )

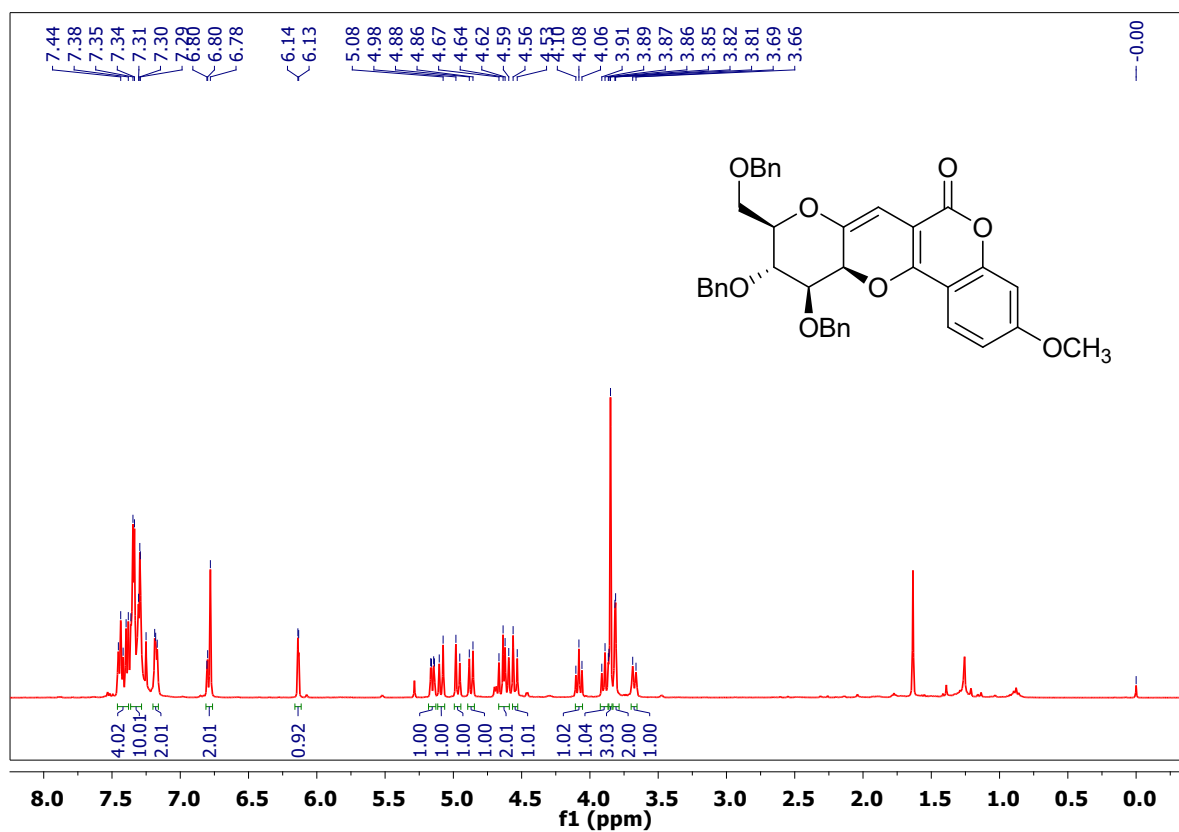

Figure 41:  $^1\text{H}$  NMR spectrum of compound **5f** (400 MHz,  $\text{CDCl}_3$ )

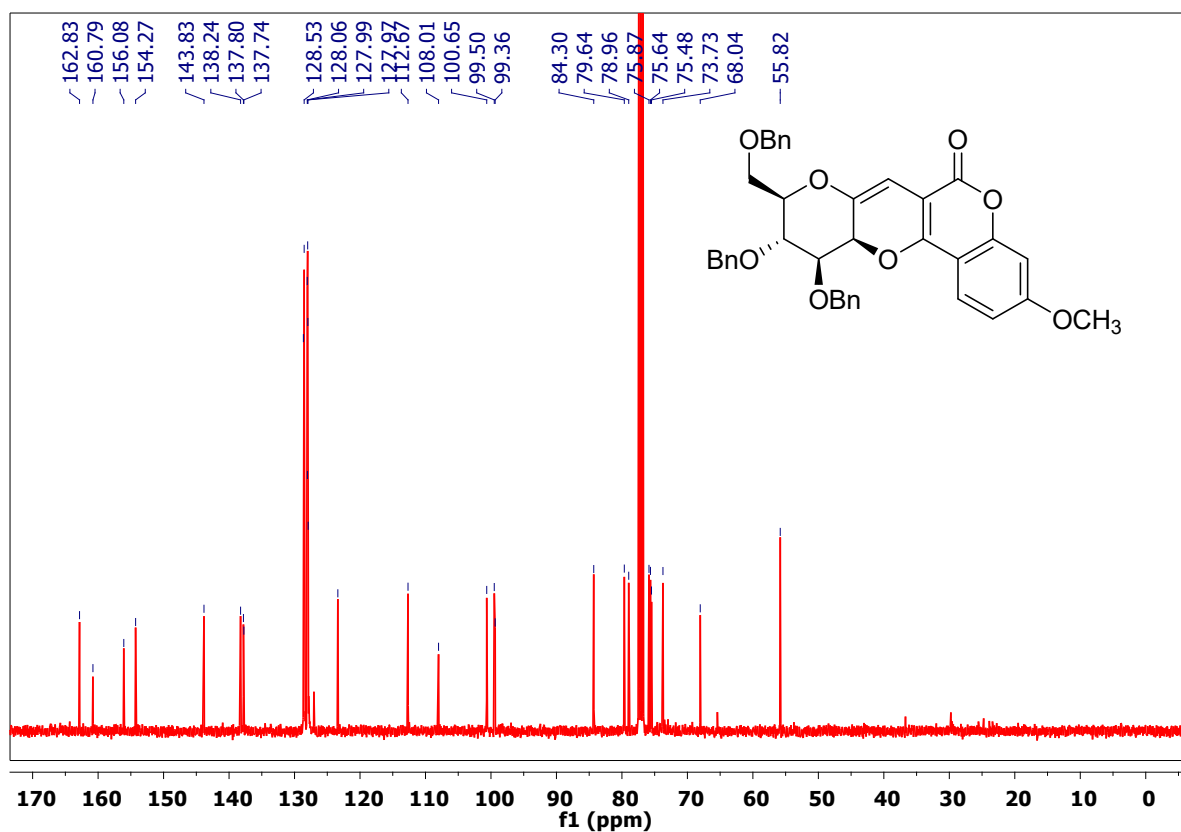

Figure 42:  $^{13}\text{C}$  NMR spectrum of compound **5f** (100.6 MHz,  $\text{CDCl}_3$ )

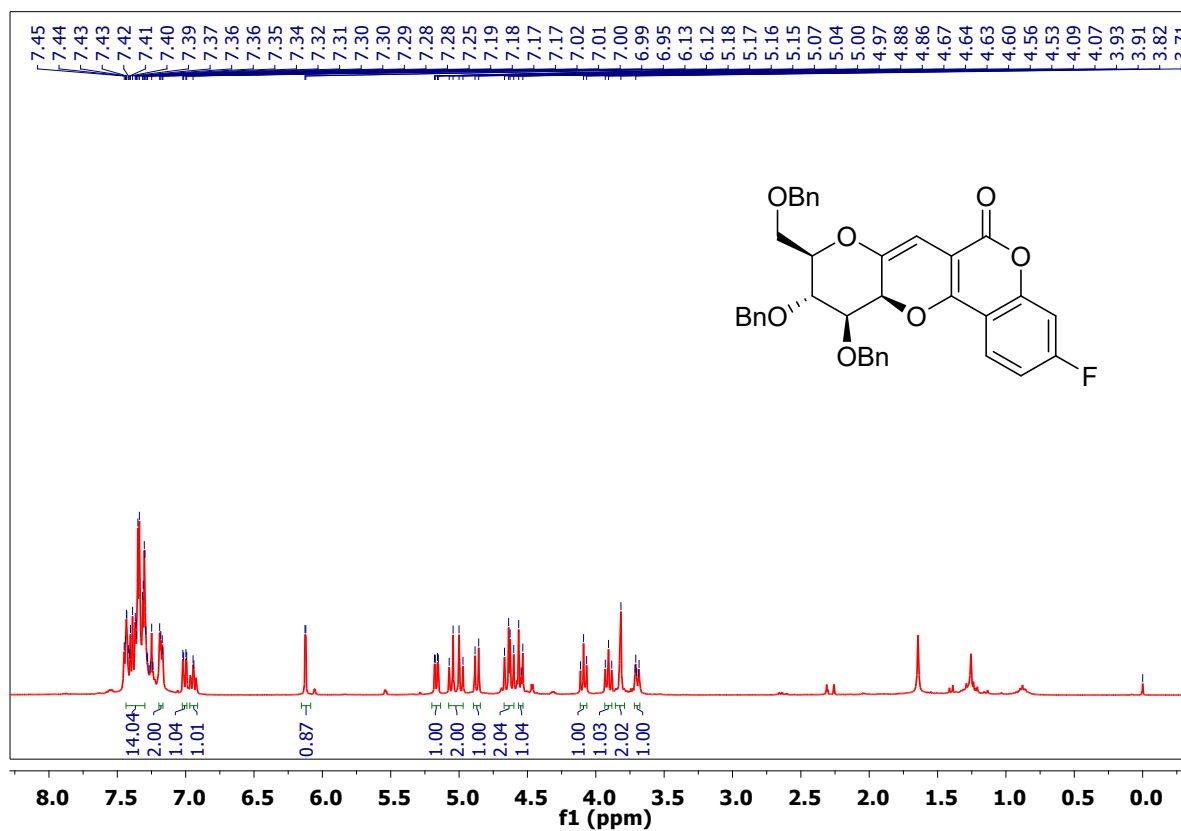

**Figure 43:**  $^1\text{H}$  NMR spectrum of compound **5g** (400 MHz,  $\text{CDCl}_3$ )

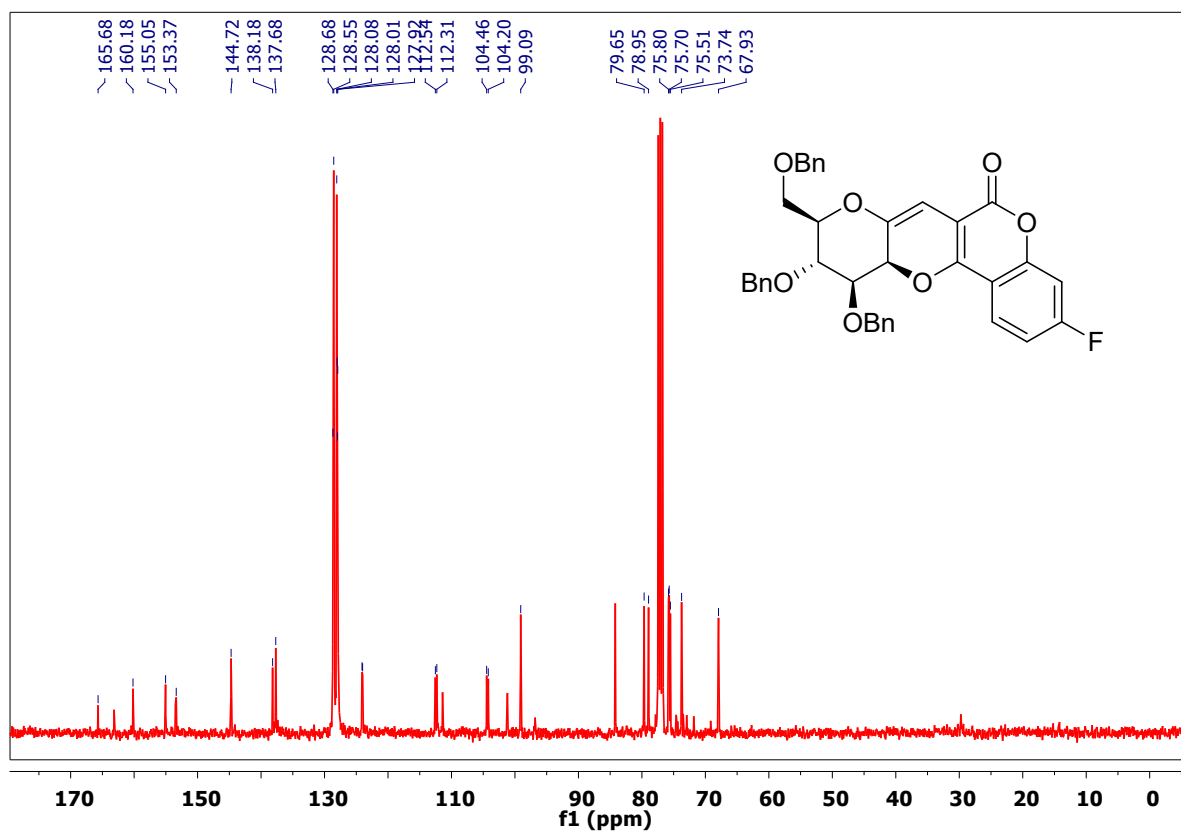

**Figure 44:**  $^{13}\text{C}$  NMR spectrum of compound **5g** (100.6 MHz,  $\text{CDCl}_3$ )

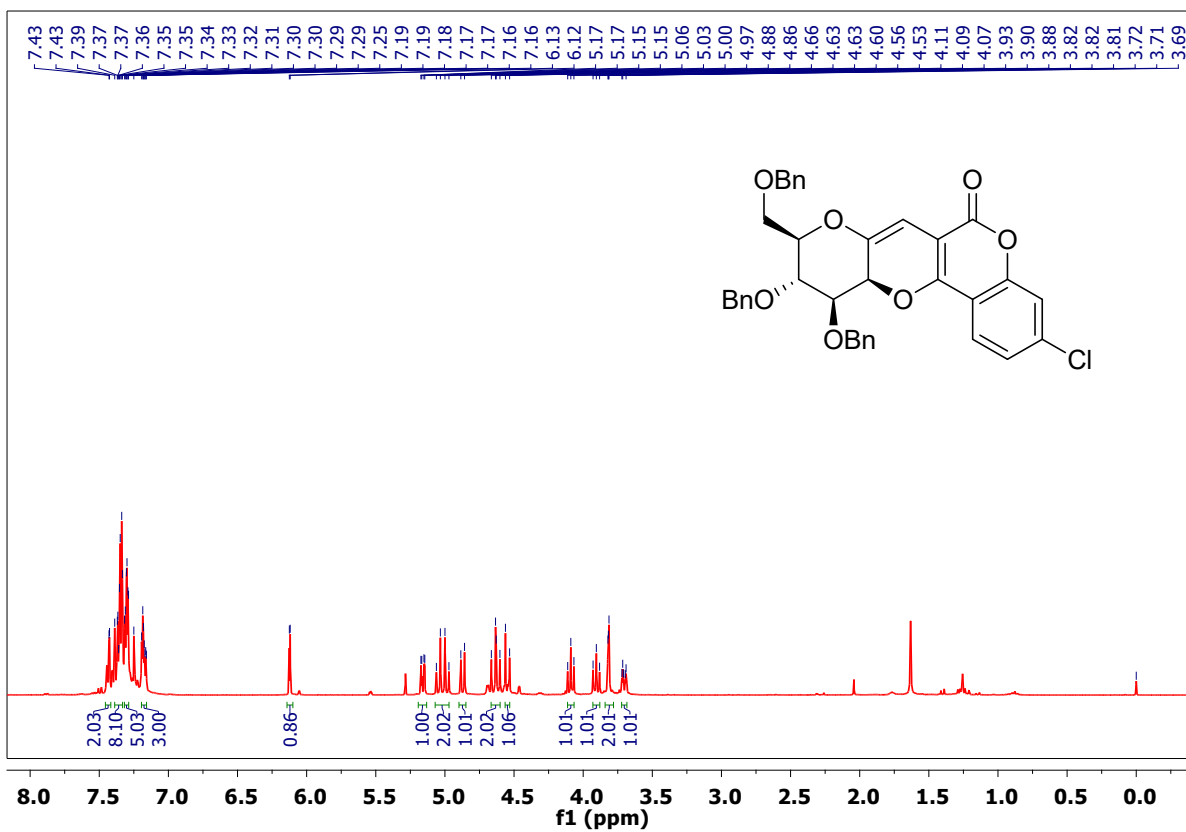

Figure 45: <sup>1</sup>H NMR spectrum of compound **5h** (400 MHz, CDCl<sub>3</sub>)

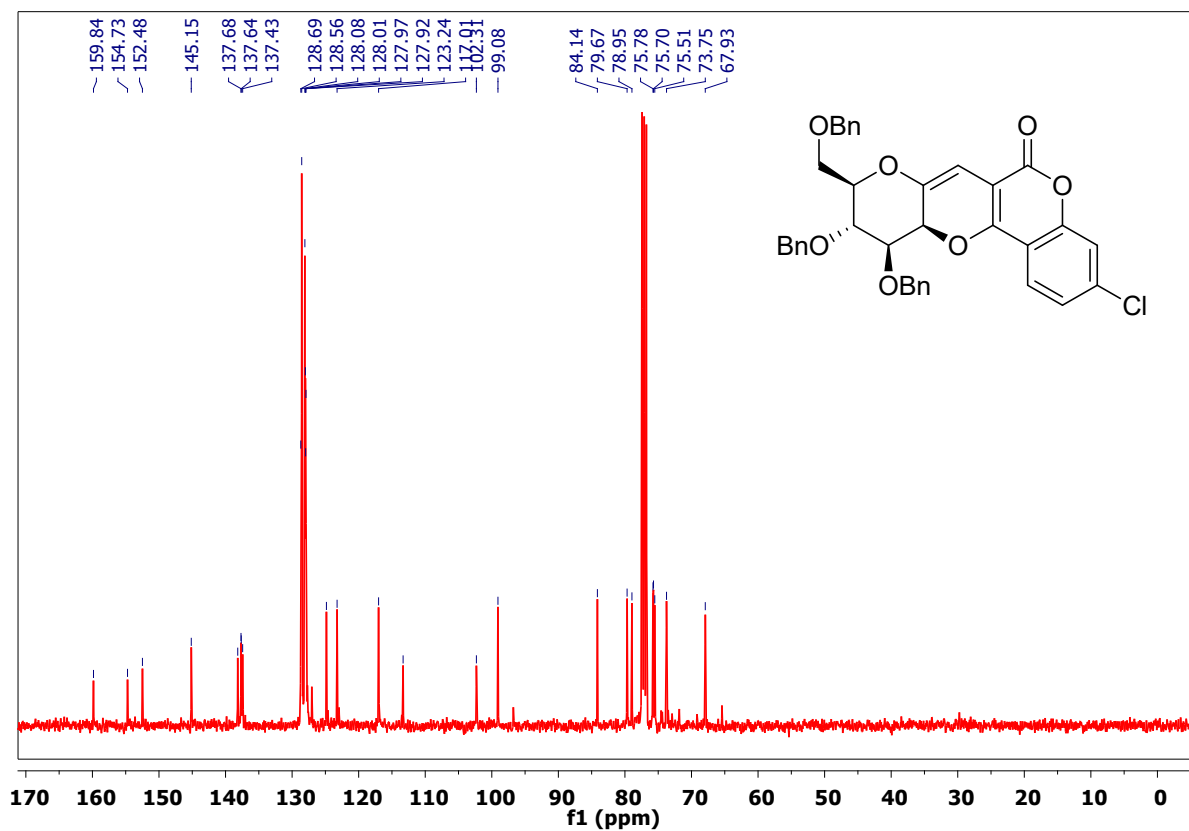

Figure 46:  $^{13}\text{C}$  NMR spectrum of compound **5h** (100.6 MHz,  $\text{CDCl}_3$ )

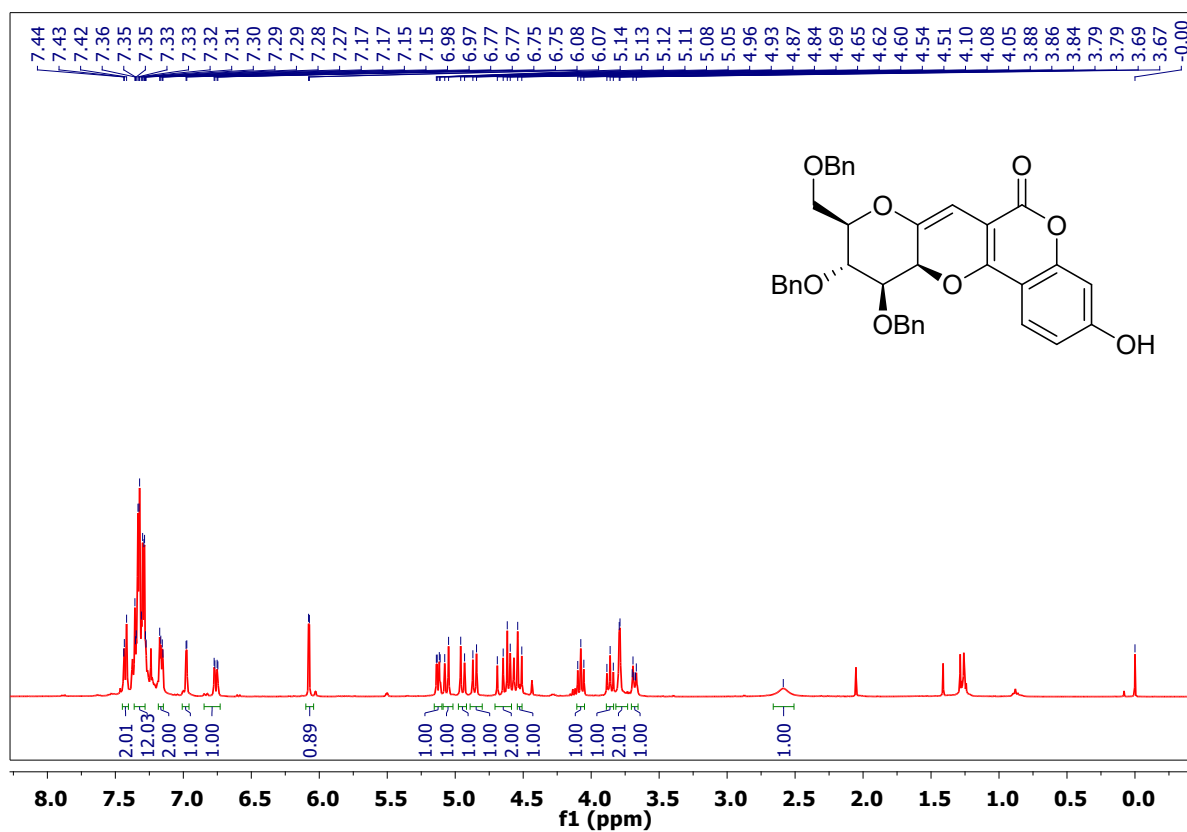

Figure 47:  $^1\text{H}$  NMR spectrum of compound **5i** (400 MHz,  $\text{CDCl}_3$ )



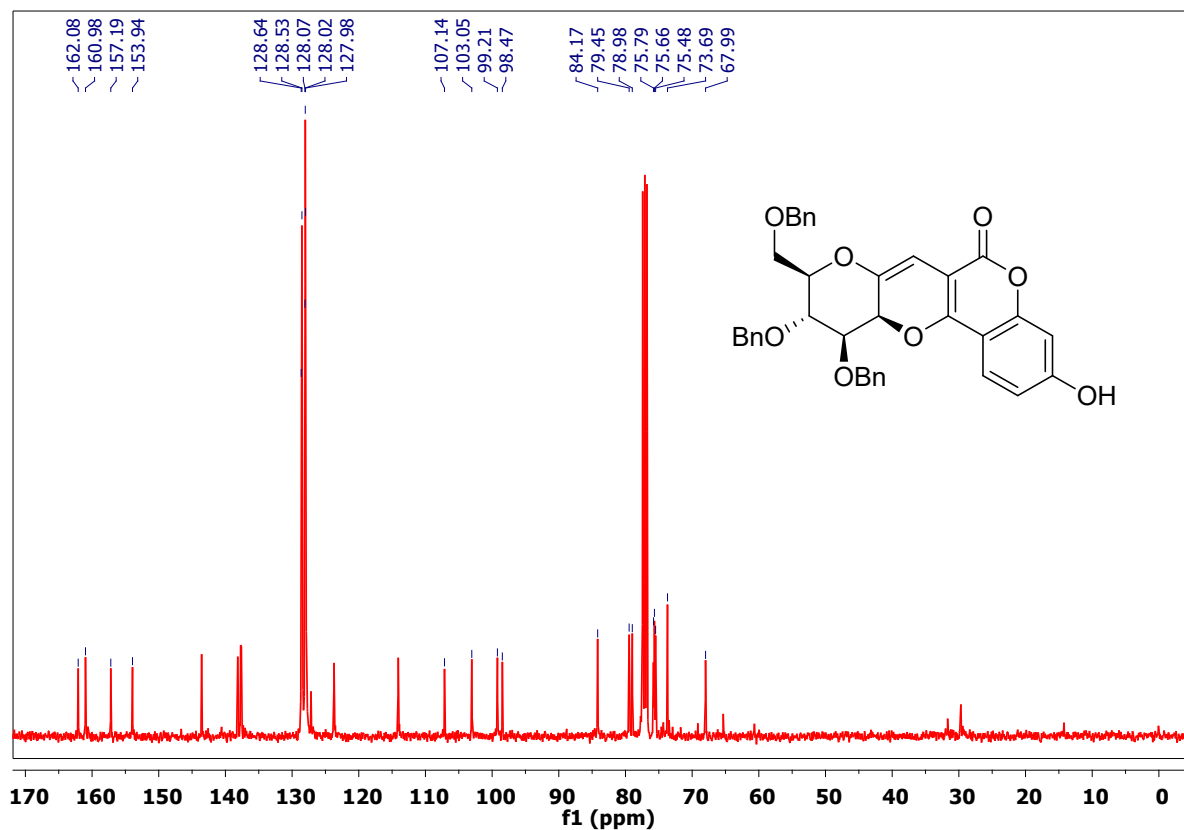

Figure 48:  $^{13}\text{C}$  NMR spectrum of compound 5i (100.6 MHz,  $\text{CDCl}_3$ )

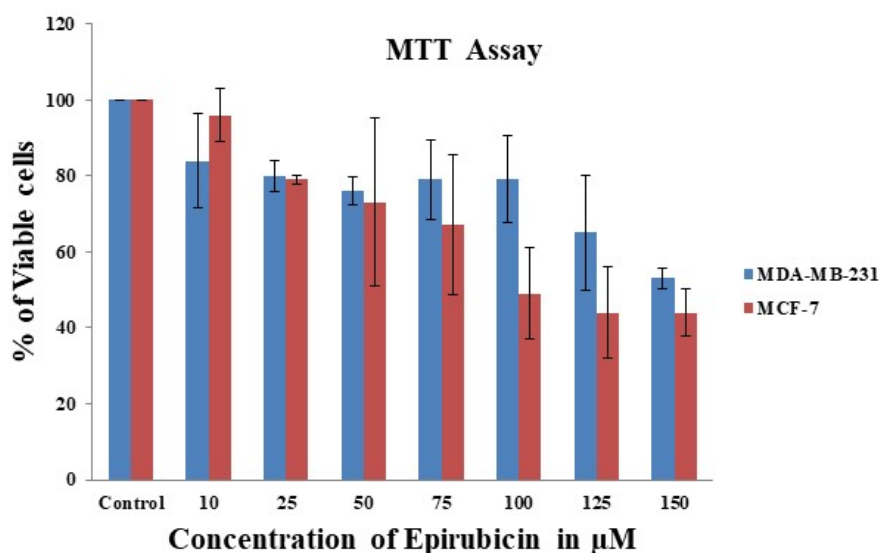

Figure 49. The MTT assay of Epirubicin at different concentration for MCF-7 and MDA-MB-231 cancer cells

## MTT Assay

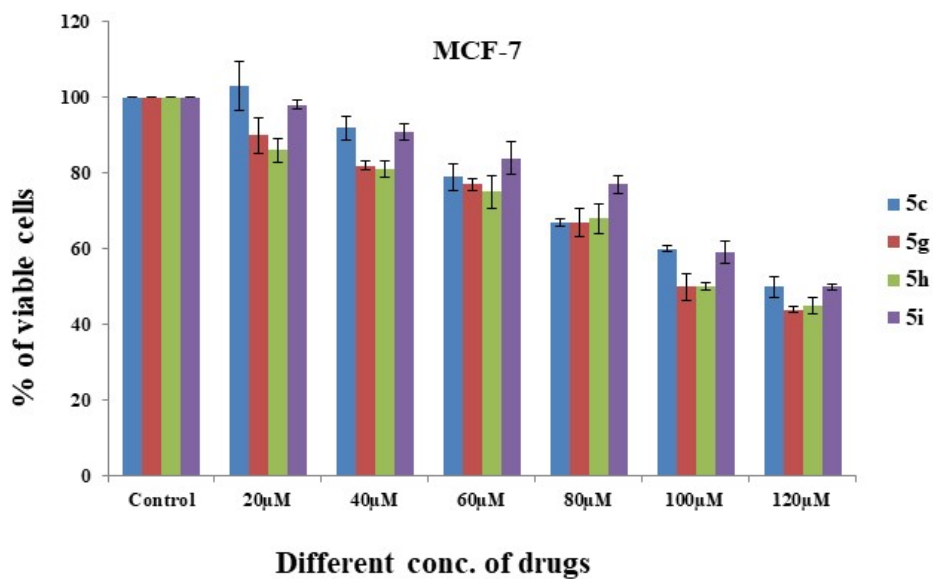

**Figure 50.** The MTT assay of compounds **5c**, **5g**, **5h** and **5i** at different concentration for MCF-7.

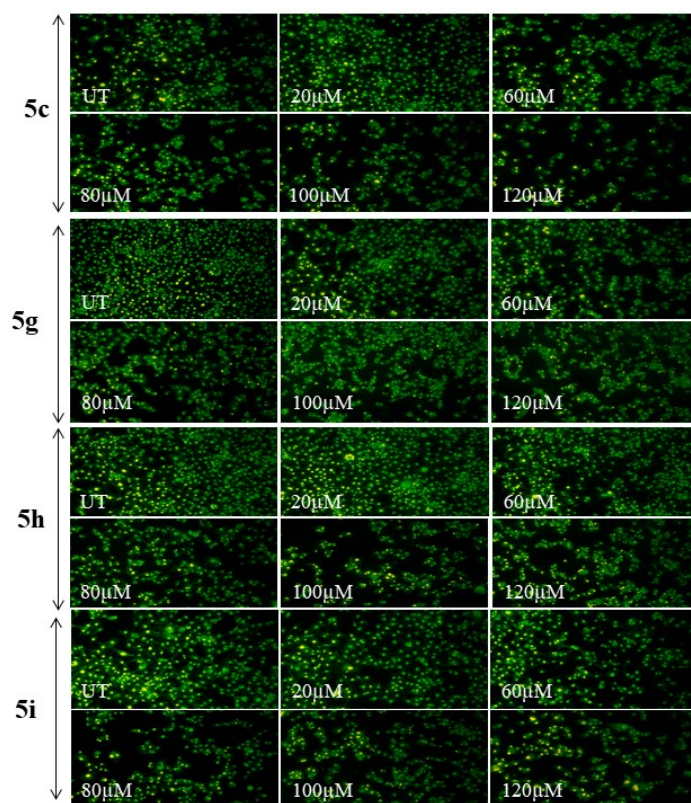

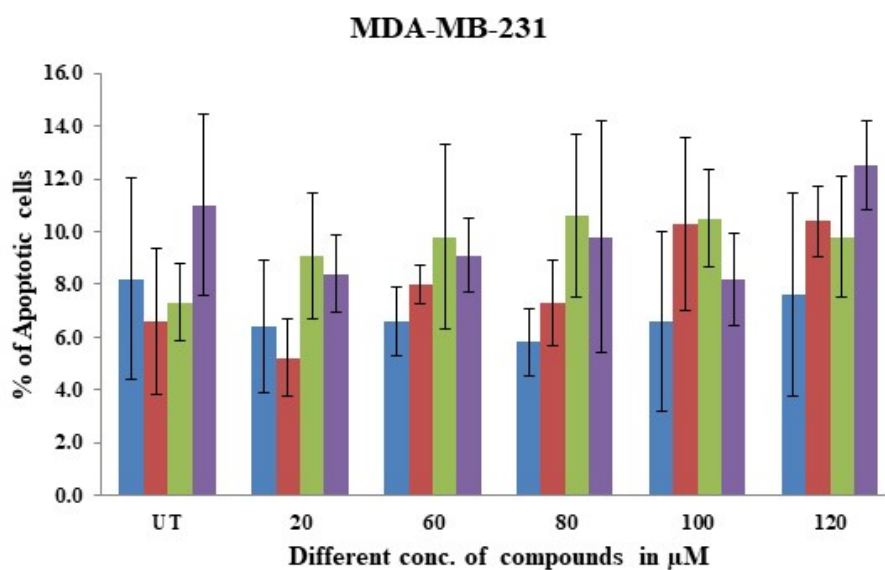

**Figure 51. [A] Sugar fused pyrano[3,2-*c*]pyranones showing apoptotic changes:** MDA-MB-231 cells treated with **5c**, **5g**, **5h** & **5i** compounds for 24 hours, cells stained with Acridine orange and Ethidium bromide staining, drug intake by cells indicate imitation of cell death were observed in inverted fluorescence microscope at 10X magnification. [B] Quantification of apoptotic cell no. calculated by using image J software and histogram was plotted as % of apoptotic cell vs compound concentration.

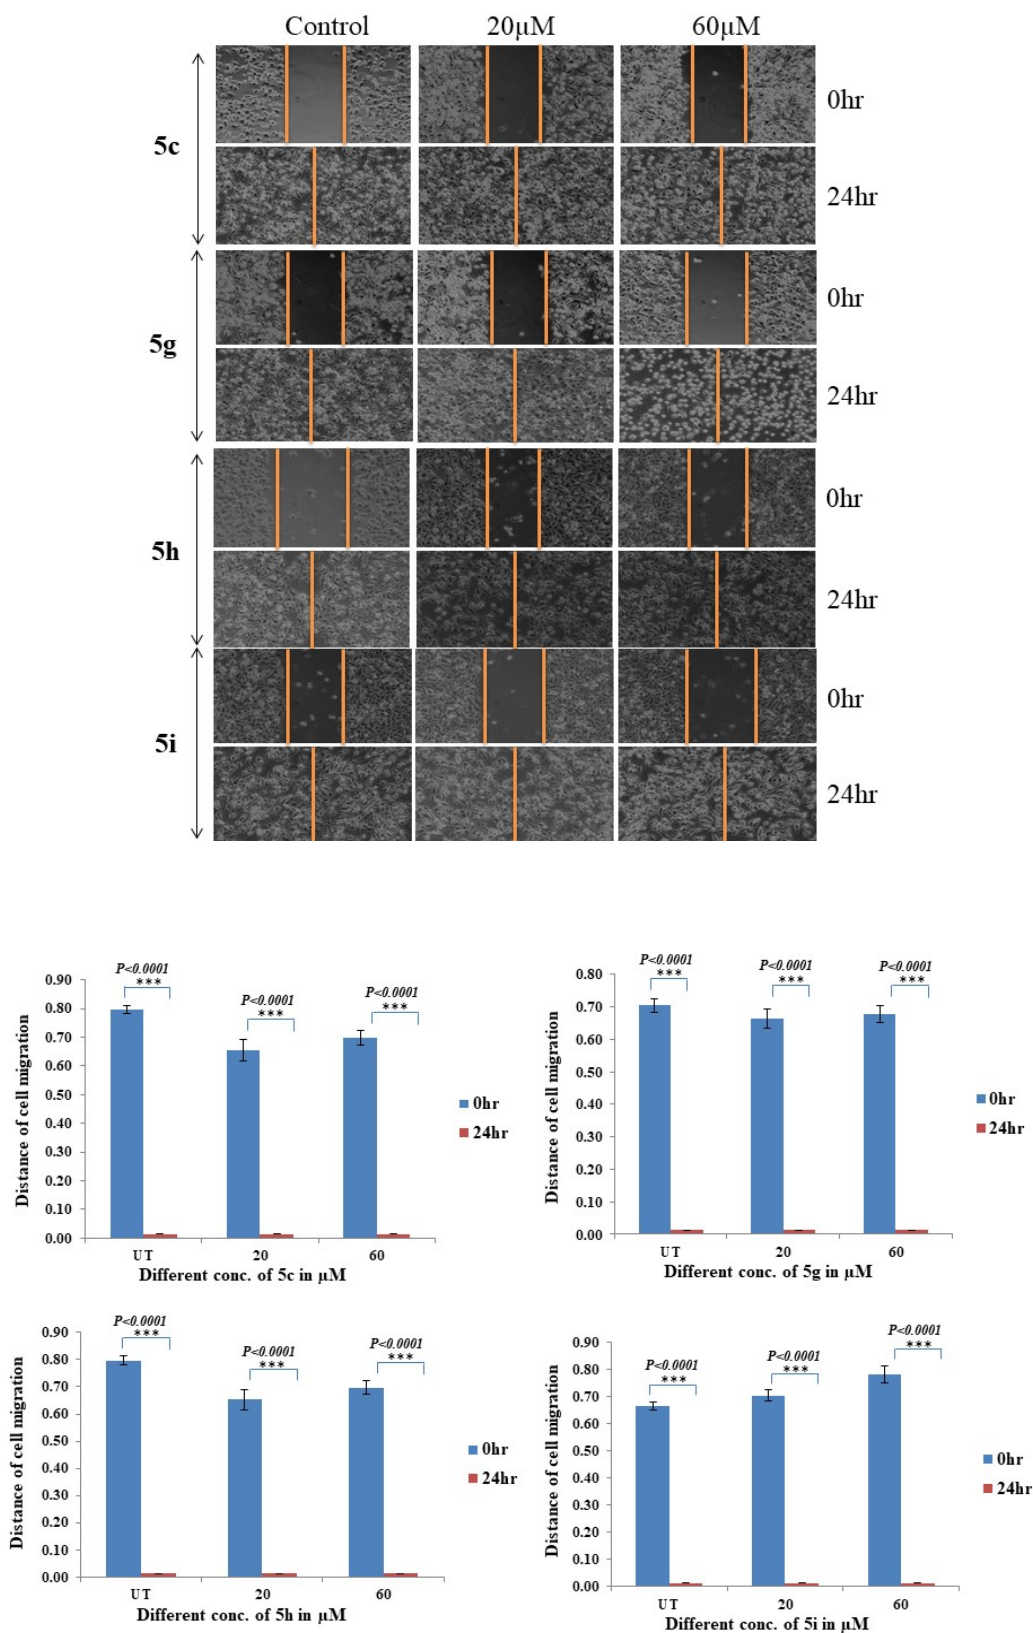

**Figure 52. Compounds 5c, 5g, 5h and 5i regulation towards MDA-MB-231 breast cancer cell migration.** [A] The cell migration was analysed by wound healing assay. Confluent monolayer of MDA-MB-231 cells was scratched using pipette tip and the cells were incubated with indicated concentrations of these compounds. Images were taken at 0 and 24 hours. In untreated

control gap was filled after 24 hours, whereas compounds **5c**, **5g**, **5h** and **5i** treated cells, migration was inhibited and gap is still remain. [B]The images are representative of three assays. Bar graph (down) represents not a significant cell migration inhibition by these compounds at 20 and 60  $\mu\text{M}$  as compared to untreated control.
